# Supplementary material for: Glucosinolate Induction and Resistance to the Cabbage Moth, Mamestra brassicae, Differs among Kale Genotypes with High and Low Content of Sinigrin and Glucobrassicin
Source: MDPI journal article supplement (doi:10.3390/plants10091951), 2021-09-18
Supplement: s1 [file s1]

Glucosinolate induction and resistance to the cabbage moth, *Mamestra brassicae*, differs among kale genotypes with high and low content of sinigrin and glucobrassicin

Francisco Rubén Badenes-Pérez<sup>1</sup> and María Elena Cartea<sup>2</sup>

<sup>1</sup> *Instituto de Ciencias Agrarias, Consejo Superior de Investigaciones Científicas, 28006 Madrid, Spain*

<sup>2</sup> *Misión Biológica de Galicia, Consejo Superior de Investigaciones Científicas, 36080 Pontevedra, Spain*

Author for correspondence:

*Francisco Rubén Badenes-Pérez*

*Tel: +34 917452500*

*Email: fr.badenes@csic.es*

**Table S1.** Glucosinolate content for each time (days after treatment), genotype, and treatment (n=7-10). The treatments are control (C), jasmonic acid (JA), salicylic acid (SA), control with *M. brassicae* larvae (CL), JA with *M. brassicae* larvae (JAL), and SA with *M. brassicae* larvae (SAL). The genotypes are high in glucobrassicin (HGBS), low in glucobrassicin (LGBS), high in sinigrin (HSIN), and low in sinigrin (LSIN). The glucosinolates shown are progoitrin (PRO), glucoiberberin (GIV), 4-hydroxyglucobrassicin (OHGBS), 4-methoxyglucobrassicin (MEOHGBS), neoglucobrassicin (NEO), and gluconasturtiin (GNT). Replication was n=7-10, n=5-10, and n=3-5 for 1, 3, and 9 days after treatment, respectively. 28

| Days after treatment | Genotype | Treatment | PRO     | GIV     | OHGBS   | MEOHGBS | GNT     |
|----------------------|----------|-----------|---------|---------|---------|---------|---------|
| 1                    | HGBS     | C         | 1.1±0.1 | 0.0±0.0 | 0.3±0.1 | 0.1±0.0 | 0.0±0.0 |
| 1                    | LGBS     | C         | 0.3±0.1 | 0.0±0.0 | 0.1±0.1 | 0.0±0.0 | 0.0±0.0 |
| 1                    | HSIN     | C         | 0.5±0.2 | 0.0±0.0 | 0.3±0.1 | 0.2±0.0 | 0.0±0.0 |
| 1                    | LSIN     | C         | 0.1±0.1 | 0.0±0.0 | 0.3±0.1 | 0.1±0.0 | 0.0±0.0 |
| 1                    | HGBS     | JA        | 0.2±0.1 | 0.0±0.0 | 1.4±0.2 | 0.0±0.0 | 0.8±0.1 |
| 1                    | LGBS     | JA        | 0.2±0.1 | 0.0±0.0 | 0.9±0.2 | 0.0±0.0 | 0.5±0.2 |
| 1                    | HSIN     | JA        | 0.2±0.2 | 0.0±0.0 | 0.4±0.1 | 0.2±0.0 | 0.0±0.0 |
| 1                    | LSIN     | JA        | 0.6±0.5 | 0.0±0.0 | 0.3±0.1 | 0.2±0.1 | 0.1±0.1 |
| 1                    | HGBS     | SA        | 0.6±0.3 | 0.0±0.0 | 0.4±0.1 | 0.4±0.1 | 0.0±0.0 |
| 1                    | LGBS     | SA        | 0.4±0.1 | 0.0±0.0 | 0.1±0.0 | 0.0±0.0 | 0.0±0.0 |
| 1                    | HSIN     | SA        | 0.3±0.1 | 0.0±0.0 | 0.3±0.1 | 0.2±0.0 | 0.0±0.0 |
| 1                    | LSIN     | SA        | 0.0±0.0 | 0.0±0.0 | 0.1±0.1 | 0.1±0.0 | 0.0±0.0 |
| 3                    | HGBS     | C         | 0.0±0.0 | 0.0±0.0 | 0.0±0.0 | 0.1±0.0 | 0.0±0.0 |
| 3                    | LGBS     | C         | 0.0±0.0 | 0.0±0.0 | 0.0±0.0 | 0.1±0.0 | 0.0±0.0 |
| 3                    | HSIN     | C         | 0.6±0.3 | 0.0±0.0 | 0.0±0.0 | 0.2±0.0 | 0.0±0.0 |
| 3                    | LSIN     | C         | 0.0±0.0 | 0.0±0.0 | 0.0±0.0 | 0.1±0.0 | 0.0±0.0 |
| 3                    | HGBS     | CL        | 0.0±0.0 | 0.0±0.0 | 0.0±0.0 | 0.2±0.1 | 0.5±0.1 |
| 3                    | LGBS     | CL        | 0.2±0.2 | 0.0±0.0 | 0.0±0.0 | 0.2±0.0 | 0.0±0.0 |
| 3                    | HSIN     | CL        | 0.2±0.2 | 0.4±0.1 | 0.1±0.1 | 0.2±0.0 | 0.0±0.0 |
| 3                    | LSIN     | CL        | 0.0±0.0 | 0.0±0.0 | 0.0±0.0 | 0.1±0.0 | 0.1±0.1 |
| 3                    | HGBS     | JA        | 0.0±0.0 | 0.0±0.0 | 0.4±0.2 | 0.3±0.0 | 0.0±0.0 |

|   |             |            |         |         |         |         |         |
|---|-------------|------------|---------|---------|---------|---------|---------|
| 3 | <b>LGBS</b> | <b>JA</b>  | 0.3±0.2 | 0.0±0.0 | 0.2±0.1 | 0.3±0.0 | 0.0±0.0 |
| 3 | <b>HSIN</b> | <b>JA</b>  | 0.1±0.1 | 0.0±0.0 | 0.4±0.2 | 0.3±0.0 | 0.0±0.0 |
| 3 | <b>LSIN</b> | <b>JA</b>  | 0.2±0.1 | 0.0±0.0 | 0.6±0.3 | 0.2±0.0 | 0.0±0.0 |
| 3 | <b>HGBS</b> | <b>JAL</b> | 0.0±0.0 | 0.0±0.0 | 0.1±0.1 | 0.4±0.1 | 0.0±0.0 |
| 3 | <b>LGBS</b> | <b>JAL</b> | 0.0±0.0 | 0.0±0.0 | 0.0±0.0 | 0.3±0.0 | 0.0±0.0 |
| 3 | <b>HSIN</b> | <b>JAL</b> | 0.0±0.0 | 0.0±0.0 | 0.0±0.0 | 0.3±0.0 | 0.0±0.0 |
| 3 | <b>LSIN</b> | <b>JAL</b> | 0.0±0.0 | 0.0±0.0 | 0.1±0.1 | 0.4±0.1 | 0.0±0.0 |
| 3 | <b>HGBS</b> | <b>SA</b>  | 0.1±0.1 | 0.0±0.0 | 0.5±0.2 | 0.3±0.0 | 0.0±0.0 |
| 3 | <b>LGBS</b> | <b>SA</b>  | 0.1±0.1 | 0.0±0.0 | 0.5±0.1 | 0.2±0.0 | 0.0±0.0 |
| 3 | <b>HSIN</b> | <b>SA</b>  | 0.3±0.1 | 0.0±0.0 | 0.5±0.1 | 0.2±0.0 | 0.0±0.0 |
| 3 | <b>LSIN</b> | <b>SA</b>  | 0.2±0.2 | 0.0±0.0 | 0.2±0.1 | 0.1±0.0 | 0.1±0.1 |
| 3 | <b>HGBS</b> | <b>SAL</b> | 0.0±0.0 | 0.0±0.0 | 0.0±0.0 | 0.2±0.1 | 0.0±0.0 |
| 3 | <b>LGBS</b> | <b>SAL</b> | 0.0±0.0 | 0.0±0.0 | 0.1±0.1 | 0.2±0.0 | 0.0±0.0 |
| 3 | <b>HSIN</b> | <b>SAL</b> | 0.0±0.0 | 0.0±0.0 | 0.0±0.0 | 0.4±0.1 | 0.0±0.0 |
| 3 | <b>LSIN</b> | <b>SAL</b> | 0.0±0.0 | 0.0±0.0 | 0.0±0.0 | 0.2±0.0 | 0.1±0.1 |
| 9 | <b>HGBS</b> | <b>C</b>   | 0.0±0.0 | 0.0±0.0 | 0.0±0.0 | 0.2±0.1 | 0.0±0.0 |
| 9 | <b>LGBS</b> | <b>C</b>   | 0.0±0.0 | 0.0±0.0 | 0.1±0.1 | 0.1±0.0 | 0.0±0.0 |
| 9 | <b>HSIN</b> | <b>C</b>   | 0.3±0.3 | 0.0±0.0 | 0.0±0.0 | 0.3±0.1 | 0.0±0.0 |
| 9 | <b>LSIN</b> | <b>C</b>   | 0.0±0.0 | 0.0±0.0 | 0.0±0.0 | 0.2±0.0 | 0.0±0.0 |
| 9 | <b>HGBS</b> | <b>CL</b>  | 1.8±0.2 | 0.0±0.0 | 0.2±0.2 | 0.2±0.0 | 0.0±0.0 |
| 9 | <b>LGBS</b> | <b>CL</b>  | 1.5±0.4 | 0.0±0.0 | 0.1±0.1 | 0.3±0.1 | 0.0±0.0 |
| 9 | <b>HSIN</b> | <b>CL</b>  | 3.8±0.6 | 0.0±0.0 | 0.1±0.1 | 0.2±0.0 | 0.0±0.0 |
| 9 | <b>LSIN</b> | <b>CL</b>  | 2.2±1.1 | 0.0±0.0 | 0.3±0.3 | 0.2±0.1 | 0.0±0.0 |
| 9 | <b>HGBS</b> | <b>JA</b>  | 0.2±0.2 | 0.0±0.0 | 0.1±0.1 | 0.2±0.0 | 0.0±0.0 |
| 9 | <b>LGBS</b> | <b>JA</b>  | 0.0±0.0 | 0.0±0.0 | 0.0±0.0 | 0.3±0.1 | 0.0±0.0 |
| 9 | <b>HSIN</b> | <b>JA</b>  | 0.0±0.0 | 0.0±0.0 | 0.7±0.2 | 0.3±0.0 | 0.0±0.0 |
| 9 | <b>LSIN</b> | <b>JA</b>  | 0.2±0.2 | 0.0±0.0 | 0.3±0.2 | 0.3±0.1 | 0.0±0.0 |
| 9 | <b>HGBS</b> | <b>JAL</b> | 0.0±0.0 | 0.0±0.0 | 0.0±0.0 | 0.3±0.1 | 0.0±0.0 |
| 9 | <b>LGBS</b> | <b>JAL</b> | 0.0±0.0 | 0.0±0.0 | 0.0±0.0 | 0.2±0.0 | 0.0±0.0 |
| 9 | <b>HSIN</b> | <b>JAL</b> | 0.0±0.0 | 0.0±0.0 | 0.0±0.0 | 0.1±0.1 | 0.8±0.2 |

|   |             |            |         |         |         |         |         |
|---|-------------|------------|---------|---------|---------|---------|---------|
| 9 | <b>LSIN</b> | <b>JAL</b> | 0.0±0.0 | 0.0±0.0 | 0.0±0.0 | 0.3±0.1 | 0.0±0.0 |
| 9 | <b>HGBS</b> | <b>SA</b>  | 0.0±0.0 | 0.0±0.0 | 0.3±0.2 | 0.4±0.1 | 0.0±0.0 |
| 9 | <b>LGBS</b> | <b>SA</b>  | 0.4±0.4 | 0.0±0.0 | 0.3±0.3 | 0.3±0.0 | 0.0±0.0 |
| 9 | <b>HSIN</b> | <b>SA</b>  | 0.2±0.2 | 0.0±0.0 | 0.0±0.0 | 0.3±0.1 | 0.0±0.0 |
| 9 | <b>LSIN</b> | <b>SA</b>  | 0.0±0.0 | 0.0±0.0 | 0.1±0.1 | 0.2±0.0 | 0.0±0.0 |
| 9 | <b>HGBS</b> | <b>SAL</b> | 0.0±0.0 | 0.0±0.0 | 0.0±0.0 | 0.2±0.0 | 0.0±0.0 |
| 9 | <b>LGBS</b> | <b>SAL</b> | 0.0±0.0 | 0.0±0.0 | 0.1±0.1 | 0.2±0.0 | 0.0±0.0 |
| 9 | <b>HSIN</b> | <b>SAL</b> | 0.6±0.4 | 0.0±0.0 | 0.2±0.1 | 0.3±0.0 | 0.0±0.0 |
| 9 | <b>LSIN</b> | <b>SAL</b> | 0.1±0.1 | 0.0±0.0 | 0.1±0.1 | 0.2±0.0 | 0.0±0.0 |

**Table S2.** Differences in glucosinolate content across times (days after treatment with JA and SA). Test statistic and *P*-values of ANOVA or Kruskal-Wallis test shown to compare differences in glucosinolate content among times (1, 3, and 9 days after treatment in the case of the treatments C, JA, and SA, and 3 and 9 days after treatment in the case of CL, JAL, and SAL) within the same genotype. Significant *P*-values ( $P \leq 0.05$ ) are shown in bold type.

| Treatment | Gluc. | HGBS                                    | LGBS                                    | HSIN                                    | LSIN                                    |
|-----------|-------|-----------------------------------------|-----------------------------------------|-----------------------------------------|-----------------------------------------|
| C         | AL    | 0.73; $P=0.495$                         | 0.56; $P=0.581$                         | 2.81; $P=0.082$                         | 0.08; $P=0.924$                         |
| C         | IN    | 14.06; <b><math>P \leq 0.001</math></b> | 7.56; <b><math>P=0.003</math></b>       | 6.07; <b><math>P=0.008</math></b>       | 1.41; $P=0.265$                         |
| C         | TO    | 2.98; $P=0.075$                         | 2.02; $P=0.156$                         | 6.48; <b><math>P=0.006</math></b>       | 0.77; $P=0.476$                         |
| C         | GIB   | 1.32; $P=0.291$                         | 0.73; $P=0.494$                         | 2.19; $P=0.136$                         | 0.12; $P=0.944$                         |
| C         | SIN   | 0.46; $P=0.641$                         | 1.26; $P=0.304$                         | 2.11; $P=0.145$                         | 6.81; <b><math>P=0.033</math></b>       |
| C         | GBS   | 12.15; <b><math>P \leq 0.001</math></b> | 8.04; <b><math>P=0.002</math></b>       | 6.11; <b><math>P=0.008</math></b>       | 1.63; $P=0.218$                         |
| C         | NEO   | 11.54; <b><math>P \leq 0.001</math></b> | 1.24; $P=0.310$                         | 5.23; <b><math>P=0.014</math></b>       | 2.71; $P=0.258$                         |
| JA        | AL    | 9.45; <b><math>P \leq 0.001</math></b>  | 1.70; $P=0.206$                         | 12.07; <b><math>P \leq 0.001</math></b> | 1.97; $P=0.165$                         |
| JA        | IN    | 17.57; <b><math>P \leq 0.001</math></b> | 2.28; $P=0.127$                         | 18.48; <b><math>P \leq 0.001</math></b> | 16.67; <b><math>P \leq 0.001</math></b> |
| JA        | TO    | 8.09; <b><math>P=0.002</math></b>       | 0.66; $P=0.525$                         | 10.33; <b><math>P \leq 0.001</math></b> | 13.89; <b><math>P \leq 0.001</math></b> |
| JA        | GIB   | 4.03; <b><math>P=0.032</math></b>       | 2.21; $P=0.134$                         | 4.25; <b><math>P=0.027</math></b>       | 3.20; $P=0.061$                         |
| JA        | SIN   | 8.09; <b><math>P=0.002</math></b>       | 1.15; $P=0.336$                         | 12.52; <b><math>P \leq 0.001</math></b> | 1.47; $P=0.253$                         |
| JA        | GBS   | 14.75; <b><math>P \leq 0.001</math></b> | 2.42; $P=0.113$                         | 8.76; <b><math>P=0.002</math></b>       | 7.70; <b><math>P=0.003</math></b>       |
| JA        | NEO   | 3.25; $P=0.058$                         | 0.38; $P=0.691$                         | 6.24; <b><math>P=0.007</math></b>       | 5.23; <b><math>P=0.014</math></b>       |
| SA        | AL    | 16.96; <b><math>P \leq 0.001</math></b> | 3.43; <b><math>P=0.050</math></b>       | 5.17; <b><math>P=0.014</math></b>       | 0.43; $P=0.659$                         |
| SA        | IN    | 3.57; <b><math>P=0.046</math></b>       | 1.42; $P=0.264$                         | 16.00; <b><math>P \leq 0.001</math></b> | 3.44; <b><math>P=0.050</math></b>       |
| SA        | TO    | 1.08; $P=0.357$                         | 1.35; $P=0.280$                         | 9.66; <b><math>P \leq 0.001</math></b>  | 1.51; $P=0.244$                         |
| SA        | GIB   | 10.36; <b><math>P \leq 0.001</math></b> | 4.20; <b><math>P=0.029</math></b>       | 7.12; <b><math>P \leq 0.001</math></b>  | 0.11; $P=0.900$                         |
| SA        | SIN   | 4.62; <b><math>P=0.022</math></b>       | 1.28; $P=0.298$                         | 1.55; $P=0.235$                         | 1.17; $P=0.329$                         |
| SA        | GBS   | 2.44; $P=0.112$                         | 1.27; $P=0.301$                         | 16.90; <b><math>P \leq 0.001</math></b> | 2.48; $P=0.107$                         |
| SA        | NEO   | 11.56; <b><math>P \leq 0.001</math></b> | 1.46; $P=0.254$                         | 5.52; <b><math>P=0.011</math></b>       | 6.94; <b><math>P=0.005</math></b>       |
| CL        | AL    | 40.31; <b><math>P \leq 0.001</math></b> | 23.36; <b><math>P \leq 0.001</math></b> | 0.92; $P=0.364$                         | 1.32; $P=0.303$                         |
| CL        | IN    | 13.19; <b><math>P=0.008</math></b>      | 3.62; $P=0.094$                         | 0.25; $P=0.629$                         | 3.75; $P=0.111$                         |
| CL        | TO    | 5.09; $P=0.059$                         | 0.37; $P=0.558$                         | 0.02; $P=0.894$                         | 2.67; $P=0.163$                         |

|     |     |                              |                              |                             |                              |
|-----|-----|------------------------------|------------------------------|-----------------------------|------------------------------|
| CL  | GIB | 0.00; <b><i>P</i>=0.016</b>  | 9.86; <b><i>P</i>=0.014</b>  | 1.05; <i>P</i> =0.335       | 1.58; <i>P</i> =0.265        |
| CL  | SIN | 17.00; <b><i>P</i>=0.004</b> | 35.95; <b><i>P</i>≤0.001</b> | 4.93; <i>P</i> =0.057       | 1.53; <i>P</i> =0.272        |
| CL  | GBS | 23.41; <b><i>P</i>=0.002</b> | 2.14; <i>P</i> =0.181        | 0.03; <i>P</i> =0.871       | 6.00; <i>P</i> =0.058        |
| CL  | NEO | 0.05; <i>P</i> =0.828        | 3.28; <i>P</i> =0.108        | 2.18; <i>P</i> =0.178       | 0.15; <i>P</i> =0.713        |
| JAL | AL  | 1.88; <i>P</i> =0.207        | 14.36; <b><i>P</i>=0.005</b> | 8.06; <b><i>P</i>=0.022</b> | 2.52; <i>P</i> =0.164        |
| JAL | IN  | 12.47; <b><i>P</i>=0.008</b> | 1.51; <i>P</i> =0.254        | 4.23; <i>P</i> =0.074       | 4.00; <i>P</i> =0.393        |
| JAL | TO  | 11.14; <b><i>P</i>=0.010</b> | 5.53; <b><i>P</i>=0.046</b>  | 9.88; <b><i>P</i>=0.014</b> | 2.67; <i>P</i> =0.153        |
| JAL | GIB | 5.00; <i>P</i> =0.056        | 11.59; <b><i>P</i>=0.009</b> | 0.08; <i>P</i> =0.791       | 7.88; <b><i>P</i>=0.031</b>  |
| JAL | SIN | 0.52; <i>P</i> =0.491        | 3.08; <i>P</i> =0.117        | 6.76; <b><i>P</i>=0.032</b> | 0.07; <i>P</i> =0.797        |
| JAL | GBS | 8.26; <b><i>P</i>=0.021</b>  | 1.29; <i>P</i> =0.290        | 0.08; <i>P</i> =0.785       | 0.45; <i>P</i> =0.525        |
| JAL | NEO | 13.03; <b><i>P</i>=0.007</b> | 0.25; <i>P</i> =0.631        | 2.00; <b><i>P</i>=0.032</b> | 3.35; <i>P</i> =0.117        |
| SAL | AL  | 23.95; <b><i>P</i>≤0.001</b> | 11.49; <b><i>P</i>=0.009</b> | 6.80; <b><i>P</i>=0.031</b> | 9.89; <b><i>P</i>=0.016</b>  |
| SAL | IN  | 0.17; <i>P</i> =0.689        | 0.20; <i>P</i> =0.668        | 0.39; <i>P</i> =0.551       | 2.76; <i>P</i> =0.141        |
| SAL | TO  | 5.21; <i>P</i> =0.052        | 2.06; <i>P</i> =0.189        | 5.66; <b><i>P</i>=0.045</b> | 6.42; <b><i>P</i>=0.039</b>  |
| SAL | GIB | 6.62; <b><i>P</i>=0.033</b>  | 0.00; <b><i>P</i>=0.008</b>  | 0.00; <b><i>P</i>=0.008</b> | 13.61; <b><i>P</i>=0.008</b> |
| SAL | SIN | 0.00; <b><i>P</i>=0.008</b>  | 4.46; <i>P</i> =0.068        | 2.99; <i>P</i> =0.122       | 2.22; <i>P</i> =0.180        |
| SAL | GBS | 0.23; <i>P</i> =0.644        | 0.13; <i>P</i> =0.731        | 1.51; <i>P</i> =0.254       | 0.14; <i>P</i> =0.721        |
| SAL | NEO | 0.05; <i>P</i> =0.832        | 0.57; <i>P</i> =0.472        | 2.81; <i>P</i> =0.132       | 0.88; <i>P</i> =0.380        |

**Table S3.** Mean  $\pm$  SE glucosinolate content ( $\mu\text{mol g}^{-1}$  plant dry weight) for each treatment and genotype after the application of phytohormones, 1, 3, and 9 days after treatment. The treatments are control (C), jasmonic acid (JA), salicylic acid (SA), control with *M. brassicae* larvae (CL), JA with *M. brassicae* larvae (JAL), and SA with *M. brassicae* larvae (SAL). The genotypes are high in glucobrassicin (HGBS), low in glucobrassicin (LGBS), high in sinigrin (HSIN), and low in sinigrin (LSIN). The glucosinolates shown are glucoiberin (GIB), sinigrin (SIN), glucobrassicin (GBS), neoglucobrassicin (NEO), total aliphatic (AL), total indolic (IN), and total glucosinolates (TO). The less abundant glucosinolates progoitrin (PRO), glucoiberin (GIV), 4-hydroxyglucobrassicin (OHGBS), 4-methoxyglucobrassicin (MEOHGBS), and gluconasturtiin (GNT) are not shown here, but are shown as supplementary data. For each genotype and treatment, means within a column followed by different letters show significant differences ( $P \leq 0.05$ ) in time (days after treatment). Replication was n=7-10, n=5-10, and n=3-5 for 1, 3, and 9 days after treatment, respectively.

| Genotype | Treatment | Days after treatment | GIB             | SIN             | GBS             | NEO             | AL               | IN               | TO               |
|----------|-----------|----------------------|-----------------|-----------------|-----------------|-----------------|------------------|------------------|------------------|
| HGBS     | C         | 1                    | 3.9 $\pm$ 0.6a  | 9.3 $\pm$ 1.3a  | 6.8 $\pm$ 1.6a  | 0.3 $\pm$ 0.1a  | 13.3 $\pm$ 1.8a  | 7.5 $\pm$ 1.6a   | 20.8 $\pm$ 3.1a  |
|          |           | 3                    | 4.4 $\pm$ 0.6a  | 10.7 $\pm$ 0.9a | 9.0 $\pm$ 0.4a  | 0.6 $\pm$ 0.2a  | 15.1 $\pm$ 1.3a  | 9.7 $\pm$ 0.5a   | 24.8 $\pm$ 1.5a  |
|          |           | 9                    | 3.0 $\pm$ 0.3a  | 9.4 $\pm$ 1.7a  | 16.6 $\pm$ 2.4b | 2.1 $\pm$ 0.5b  | 12.4 $\pm$ 1.9a  | 18.9 $\pm$ 2.8b  | 31.3 $\pm$ 4.5a  |
|          | JA        | 1                    | 6.6 $\pm$ 1.2a  | 13.4 $\pm$ 1.6a | 20.0 $\pm$ 2.8a | 8.0 $\pm$ 1.7a  | 20.2 $\pm$ 2.4a  | 29.4 $\pm$ 3.5a  | 50.4 $\pm$ 4.5a  |
|          |           | 3                    | 3.0 $\pm$ 0.5b  | 6.0 $\pm$ 1.1b  | 41.1 $\pm$ 3.6b | 17.8 $\pm$ 4.7a | 9.0 $\pm$ 1.5b   | 59.6 $\pm$ 5.2b  | 68.6 $\pm$ 5.4b  |
|          |           | 9                    | 4.7 $\pm$ 1.0ab | 6.7 $\pm$ 2.0b  | 20.1 $\pm$ 2.3a | 5.9 $\pm$ 1.1a  | 11.5 $\pm$ 1.8b  | 26.4 $\pm$ 2.3a  | 38.0 $\pm$ 3.7a  |
|          | SA        | 1                    | 7.6 $\pm$ 1.0a  | 12.9 $\pm$ 1.7a | 8.8 $\pm$ 1.4a  | 0.7 $\pm$ 0.2a  | 21.2 $\pm$ 1.5a  | 10.3 $\pm$ 1.4a  | 31.5 $\pm$ 1.8a  |
|          |           | 3                    | 4.0 $\pm$ 0.5b  | 11.0 $\pm$ 1.0a | 14.3 $\pm$ 2.3a | 1.1 $\pm$ 0.3a  | 15.1 $\pm$ 1.2b  | 16.2 $\pm$ 2.4b  | 31.2 $\pm$ 3.2a  |
|          |           | 9                    | 2.5 $\pm$ 0.5b  | 6.3 $\pm$ 0.6b  | 13.6 $\pm$ 2.6a | 3.0 $\pm$ 0.7b  | 8.8 $\pm$ 0.9c   | 17.2 $\pm$ 1.8b  | 26.1 $\pm$ 2.0a  |
|          | CL        | 3                    | 4.0 $\pm$ 0.3a  | 4.9 $\pm$ 0.7a  | 8.0 $\pm$ 1.4a  | 4.0 $\pm$ 1.0a  | 8.9 $\pm$ 0.6a   | 12.2 $\pm$ 2.2a  | 21.6 $\pm$ 2.2a  |
|          |           | 9                    | 0.9 $\pm$ 0.2b  | 1.8 $\pm$ 0.1b  | 20.6 $\pm$ 2.4b | 3.7 $\pm$ 1.0a  | 4.5 $\pm$ 0.3b   | 24.7 $\pm$ 2.7b  | 29.2 $\pm$ 2.5a  |
|          | JAL       | 3                    | 4.3 $\pm$ 0.7a  | 4.9 $\pm$ 1.5a  | 60.4 $\pm$ 7.8a | 22.8 $\pm$ 4.3a | 9.2 $\pm$ 2.2a   | 83.7 $\pm$ 11.0a | 92.9 $\pm$ 12.4a |
|          |           | 9                    | 1.7 $\pm$ 0.9a  | 3.6 $\pm$ 0.9a  | 36.8 $\pm$ 2.5b | 7.0 $\pm$ 0.8b  | 5.3 $\pm$ 1.7a   | 44.1 $\pm$ 2.3b  | 49.4 $\pm$ 3.9b  |
|          | SAL       | 3                    | 4.3 $\pm$ 0.8a  | 11.4 $\pm$ 1.3a | 20.7 $\pm$ 3.4a | 3.4 $\pm$ 0.5a  | 15.7 $\pm$ 1.7a  | 24.3 $\pm$ 3.5a  | 40.0 $\pm$ 4.2a  |
|          |           | 9                    | 2.0 $\pm$ 0.4b  | 3.3 $\pm$ 1.1b  | 18.8 $\pm$ 1.9a | 3.6 $\pm$ 0.9a  | 5.3 $\pm$ 1.3b   | 22.6 $\pm$ 2.1a  | 27.9 $\pm$ 3.2a  |
| LGBS     | C         | 1                    | 4.5 $\pm$ 0.7a  | 7.2 $\pm$ 0.7a  | 4.1 $\pm$ 0.5a  | 0.2 $\pm$ 0.1a  | 12.9 $\pm$ 1.2a  | 4.6 $\pm$ 0.5a   | 16.7 $\pm$ 1.4a  |
|          |           | 3                    | 5.6 $\pm$ 0.9a  | 8.6 $\pm$ 1.0a  | 5.5 $\pm$ 0.4a  | 0.4 $\pm$ 0.1a  | 14.2 $\pm$ 1.5a  | 6.1 $\pm$ 0.4a   | 20.2 $\pm$ 1.6a  |
|          |           | 9                    | 4.0 $\pm$ 1.1a  | 9.6 $\pm$ 1.5a  | 8.5 $\pm$ 1.6b  | 0.3 $\pm$ 0.1a  | 13.6 $\pm$ 2.5a  | 9.0 $\pm$ 1.6b   | 22.7 $\pm$ 4.1a  |
|          | JA        | 1                    | 7.3 $\pm$ 1.2a  | 10.7 $\pm$ 2.1a | 17.3 $\pm$ 2.9a | 1.8 $\pm$ 0.3a  | 18.2 $\pm$ 3.3a  | 20.1 $\pm$ 3.0a  | 38.8 $\pm$ 4.9a  |
|          |           | 3                    | 4.1 $\pm$ 0.8a  | 6.9 $\pm$ 1.3a  | 22.1 $\pm$ 2.8a | 2.4 $\pm$ 0.9a  | 11.3 $\pm$ 1.9a  | 25.0 $\pm$ 3.0a  | 36.4 $\pm$ 3.9a  |
|          |           | 9                    | 6.6 $\pm$ 4.1a  | 9.0 $\pm$ 1.9a  | 12.1 $\pm$ 2.6a | 2.6 $\pm$ 0.8a  | 15.6 $\pm$ 2.7a  | 15.0 $\pm$ 5.2a  | 30.5 $\pm$ 4.3a  |
|          | SA        | 1                    | 8.3 $\pm$ 1.0a  | 12.8 $\pm$ 2.4a | 6.1 $\pm$ 0.8a  | 0.7 $\pm$ 0.1a  | 21.5 $\pm$ 2.8a  | 7.0 $\pm$ 0.9a   | 28.5 $\pm$ 3.3a  |
|          |           | 3                    | 6.2 $\pm$ 1.0ab | 10.0 $\pm$ 1.3a | 8.6 $\pm$ 0.9a  | 0.4 $\pm$ 0.1a  | 16.4 $\pm$ 1.6ab | 9.7 $\pm$ 1.0a   | 26.0 $\pm$ 2.0a  |

|      |     |   |           |           |            |           |           |            |            |
|------|-----|---|-----------|-----------|------------|-----------|-----------|------------|------------|
| HSIN | CL  | 9 | 3.8±0.8b  | 8.2±0.5a  | 7.4±2.5a   | 0.7±0.2a  | 12.4±0.5b | 8.6±2.5a   | 21.0±3.0a  |
|      |     | 3 | 4.2±0.4a  | 7.2±0.9a  | 12.7±1.5a  | 2.3±0.3a  | 11.6±1.0a | 15.2±1.7a  | 26.8±1.6a  |
|      |     | 9 | 2.4±0.4b  | 1.6±0.3b  | 18.4±3.6a  | 5.6±1.8a  | 5.5±0.8b  | 24.4±4.5a  | 29.9±4.7a  |
|      | JAL | 3 | 5.3±1.0a  | 6.3±1.6a  | 35.7±7.3a  | 4.6±1.0a  | 11.6±1.2a | 40.6±7.5a  | 52.3±6.7a  |
|      |     | 9 | 1.6±0.4b  | 2.9±1.0a  | 26.4±3.6a  | 3.8±1.2a  | 4.5±1.4b  | 30.4±3.5a  | 34.9±3.0b  |
|      |     | 3 | 7.5±0.6a  | 11.4±2.2a | 20.8±4.2a  | 3.1±0.7a  | 19.0±2.4a | 24.2±4.4a  | 43.2±6.4a  |
|      | SAL | 9 | 3.5±0.5b  | 6.2±1.1a  | 18.8±3.7a  | 2.5±0.5a  | 9.8±1.3b  | 21.5±4.2a  | 31.3±5.3a  |
|      |     | 1 | 3.9±0.5a  | 12.1±4.2a | 6.2±0.8a   | 0.3±0.1a  | 16.5±1.6a | 7.0±0.9a   | 23.5±2.3a  |
|      |     | 3 | 5.7±0.8a  | 15.6±1.3a | 10.7±1.3b  | 0.9±0.1ab | 21.9±1.9a | 11.8±1.4b  | 33.7±1.9b  |
|      | C   | 9 | 5.0±0.5a  | 12.7±1.3a | 11.2±1.2b  | 1.6±0.7b  | 18.0±1.3a | 13.1±1.8b  | 31.1±2.5b  |
|      |     | 1 | 4.9±0.7ab | 8.6±3.9a  | 16.8±1.9a  | 4.6±0.7a  | 13.7±1.8a | 22.0±2.1a  | 35.7±3.1a  |
|      |     | 3 | 3.2±0.5a  | 7.9±1.3a  | 40.1±5.9b  | 13.3±2.7a | 11.2±1.5a | 54.1±5.5b  | 65.3±6.1b  |
|      | JA  | 9 | 6.2±0.7b  | 18.5±2.1b | 21.8±2.6a  | 5.8±1.7a  | 24.7±2.0b | 28.6±2.7a  | 53.3±4.7b  |
|      |     | 1 | 4.3±0.5a  | 13.7±6.4a | 5.8±0.7a   | 0.3±0.1a  | 18.3±2.0a | 6.6±0.8a   | 24.9±2.5a  |
|      |     | 3 | 7.0±0.8b  | 17.3±1.6a | 13.6±1.1b  | 0.9±0.3ab | 24.6±1.5b | 15.3±1.3b  | 39.9±2.4b  |
|      | SA  | 9 | 3.4±0.6a  | 12.9±1.3a | 13.6±2.0b  | 1.5±0.4b  | 16.5±1.8a | 15.4±2.2b  | 31.8±3.0ab |
|      |     | 3 | 3.0±0.8a  | 9.0±2.8a  | 22.8±2.5a  | 4.9±2.0a  | 12.2±3.5a | 28.1±4.1a  | 40.7±4.2a  |
|      |     | 9 | 2.0±0.4a  | 2.8±0.4a  | 22.1±3.7a  | 8.8±1.7a  | 8.6±1.3a  | 31.3±4.9a  | 39.8±4.5a  |
| LSIN | JAL | 3 | 3.6±1.1a  | 9.8±2.1a  | 23.4±6.7a  | 19.6±6.1a | 13.4±2.0a | 43.2±3.3a  | 56.6±2.8a  |
|      |     | 9 | 3.1±1.1a  | 3.4±1.3b  | 25.8±5.3a  | 4.6±0.9b  | 6.5±1.4b  | 30.5±5.2a  | 37.7±5.3b  |
|      |     | 3 | 6.9±0.8a  | 13.1±3.1a | 20.4±2.8a  | 13.1±5.8a | 20.0±3.6a | 34.4±7.7a  | 54.4±5.0a  |
|      | SAL | 9 | 2.1±0.7b  | 7.5±0.6a  | 25.1±2.7a  | 3.7±1.0a  | 10.3±1.1b | 29.3±2.8a  | 39.6±3.7b  |
|      |     | 1 | 5.1±1.3a  | 2.4±0.6a  | 5.1±0.7a   | 1.1±0.6a  | 7.6±1.8a  | 6.6±1.1a   | 14.2±2.5a  |
|      |     | 3 | 4.0±0.8a  | 3.5±0.9a  | 6.9±0.9ab  | 0.8±0.2a  | 7.5±1.1a  | 7.7±0.9a   | 15.2±1.9a  |
|      | C   | 9 | 4.3±1.2a  | 4.1±0.5a  | 8.5±2.9b   | 1.7±0.5a  | 8.4±1.3a  | 10.4±3.0a  | 18.9±3.0a  |
|      |     | 1 | 2.7±0.4a  | 3.3±1.4a  | 12.5±1.8a  | 3.7±1.0a  | 6.6±1.9a  | 16.7±2.1a  | 23.4±3.4a  |
|      |     | 3 | 3.5±0.6a  | 1.8±0.5a  | 33.0±4.9b  | 17.2±4.8b | 5.4±0.8a  | 51.0±5.8b  | 56.3±5.6b  |
|      | JA  | 9 | 5.6±1.5a  | 4.5±1.3a  | 20.7±3.8ab | 3.6±0.6a  | 10.3±2.5a | 24.9±4.3a  | 35.2±3.7a  |
|      |     | 1 | 4.1±0.7a  | 3.4±0.7a  | 5.3±0.6a   | 1.0±0.4a  | 7.5±1.3a  | 6.6±0.7a   | 14.1±1.7a  |
|      |     | 3 | 3.7±0.8a  | 3.8±0.5a  | 10.4±2.4a  | 1.1±0.3a  | 7.6±1.1a  | 11.8±2.8ab | 19.6±3.6a  |
|      | SA  | 9 | 3.8±0.7a  | 2.2±0.5a  | 9.3±1.5a   | 4.8±1.8b  | 6.0±0.5a  | 14.4±1.4b  | 20.4±1.7a  |
|      |     | 3 | 3.1±0.5a  | 2.2±0.4a  | 25.5±4.8a  | 6.4±1.7a  | 5.3±0.5a  | 32.1±5.5a  | 37.5±6.0a  |
|      |     | 9 | 4.3±0.9a  | 1.3±0.7a  | 8.8±4.6a   | 7.8±3.4a  | 7.8±2.4a  | 17.0±5.0a  | 24.8±3.9a  |
|      | CL  | 3 | 4.5±1.0a  | 1.9±0.5a  | 21.0±5.1a  | 24.5±7.1a | 6.5±1.2a  | 45.9±5.5a  | 52.4±4.9a  |
|      |     | 9 | 0.9±0.2b  | 2.3±1.6a  | 26.3±5.8a  | 6.9±2.2a  | 3.2±1.7a  | 33.5±8.0a  | 36.7±9.6a  |
|      |     | 3 | 4.1±0.6a  | 2.9±1.1a  | 18.9±5.8a  | 10.8±5.5a | 7.1±1.3a  | 29.9±3.9a  | 37.1±4.0a  |
|      | JAL | 9 | 1.4±0.3b  | 1.0±0.2a  | 16.3±2.4a  | 4.8±1.5a  | 2.4±0.3b  | 21.5±2.8a  | 23.9±3.0b  |



**Table S4.** Effect of JA, SA, CL, JAL, and SAL treatments on glucosinolate content in the different genotypes, 1, 3, and 9 days after treatment with JA and SA. Test statistic and *P*-values of ANOVA or Kruskal-Wallis test shown to compare differences in glucosinolate content among treatments within the same genotype. Treatments included in the comparisons among treatments are C, JA, and SA (also CL for 3 and 9 days after treatment) (A), and JA compared to JAL and SA compared to SAL (3 and 9 days after treatment) (B). Significant *P*-values ( $P \leq 0.05$ ) are shown in bold type.

A

| Comparison | Days after treat. | Gluc. | HGBS                                    | LGBS                                    | HSIN                                    | LSIN                                    |
|------------|-------------------|-------|-----------------------------------------|-----------------------------------------|-----------------------------------------|-----------------------------------------|
| C-JA-SA    | 1                 | AL    | 7.26; <b><math>P=0.027</math></b>       | 3.37; <b><math>P=0.050</math></b>       | 1.69; $P=0.203$                         | 0.50; $P=0.780$                         |
| C-JA-SA    | 1                 | IN    | 22.83; <b><math>P \leq 0.001</math></b> | 21.01; <b><math>P \leq 0.001</math></b> | 42.01; <b><math>P \leq 0.001</math></b> | 16.96; <b><math>P \leq 0.001</math></b> |
| C-JA-SA    | 1                 | TO    | 18.33; <b><math>P \leq 0.001</math></b> | 9.98; <b><math>P \leq 0.001</math></b>  | 6.33; <b><math>P=0.006</math></b>       | 4.18; <b><math>P=0.027</math></b>       |
| C-JA-SA    | 1                 | GIB   | 3.15; $P=0.061$                         | 3.89; <b><math>P=0.033</math></b>       | 0.70; $P=0.507$                         | 1.62; $P=0.218$                         |
| C-JA-SA    | 1                 | SIN   | 1.66; $P=0.212$                         | 4.54; $P=0.103$                         | 2.84; $P=0.076$                         | 1.66; $P=0.437$                         |
| C-JA-SA    | 1                 | GBS   | 13.08; <b><math>P \leq 0.001</math></b> | 16.49; <b><math>P \leq 0.001</math></b> | 24.46; <b><math>P \leq 0.001</math></b> | 13.28; <b><math>P \leq 0.001</math></b> |
| C-JA-SA    | 1                 | NEO   | 15.73; <b><math>P \leq 0.001</math></b> | 14.79; <b><math>P \leq 0.001</math></b> | 35.96; <b><math>P \leq 0.001</math></b> | 1.66; <b><math>P=0.016</math></b>       |
| C-JA-SA-CL | 3                 | AL    | 6.67; <b><math>P \leq 0.001</math></b>  | 2.02; $P=0.132$                         | 12.86; <b><math>P \leq 0.001</math></b> | 1.37; $P=0.272$                         |
| C-JA-SA-CL | 3                 | IN    | 52.29; <b><math>P \leq 0.001</math></b> | 23.90; <b><math>P \leq 0.001</math></b> | 33.32; <b><math>P \leq 0.001</math></b> | 27.78; <b><math>P \leq 0.001</math></b> |
| C-JA-SA-CL | 3                 | TO    | 34.72; <b><math>P \leq 0.001</math></b> | 7.28; <b><math>P \leq 0.001</math></b>  | 12.90; <b><math>P \leq 0.001</math></b> | 21.86; <b><math>P \leq 0.001</math></b> |
| C-JA-SA-CL | 3                 | GIB   | 1.36; $P=0.275$                         | 1.30; $P=0.294$                         | 6.86; <b><math>P \leq 0.001</math></b>  | 0.20; $P=0.272$                         |
| C-JA-SA-CL | 3                 | SIN   | 8.77; <b><math>P \leq 0.001</math></b>  | 1.39; $P=0.266$                         | 8.83; <b><math>P \leq 0.001</math></b>  | 2.20; $P=0.109$                         |
| C-JA-SA-CL | 3                 | GBS   | 41.01; <b><math>P \leq 0.001</math></b> | 20.86; <b><math>P \leq 0.001</math></b> | 15.26; <b><math>P \leq 0.001</math></b> | 13.85; <b><math>P \leq 0.001</math></b> |
| C-JA-SA-CL | 3                 | NEO   | 27.39; <b><math>P \leq 0.001</math></b> | 5.15; <b><math>P=0.005</math></b>       | 14.54; <b><math>P \leq 0.001</math></b> | 24.65; <b><math>P \leq 0.001</math></b> |
| C-JA-SA-CL | 9                 | AL    | 5.42; <b><math>P=0.010</math></b>       | 5.24; <b><math>P=0.010</math></b>       | 16.49; <b><math>P \leq 0.001</math></b> | 1.11; $P=0.377$                         |
| C-JA-SA-CL | 9                 | IN    | 3.35; <b><math>P=0.047</math></b>       | 6.20; <b><math>P=0.005</math></b>       | 8.56; <b><math>P \leq 0.001</math></b>  | 8.16; <b><math>P=0.043</math></b>       |
| C-JA-SA-CL | 9                 | TO    | 2.26; $P=0.124$                         | 1.44; $P=0.268$                         | 7.38; <b><math>P=0.003</math></b>       | 6.31; <b><math>P=0.006</math></b>       |
| C-JA-SA-CL | 9                 | GIB   | 5.64; <b><math>P=0.009</math></b>       | 2.27; $P=0.120$                         | 9.85; <b><math>P \leq 0.001</math></b>  | 0.43; $P=0.735$                         |
| C-JA-SA-CL | 9                 | SIN   | 4.60; <b><math>P=0.018</math></b>       | 8.73; <b><math>P \leq 0.001</math></b>  | 21.60; <b><math>P \leq 0.001</math></b> | 7.87; <b><math>P=0.049</math></b>       |
| C-JA-SA-CL | 9                 | GBS   | 1.83; $P=0.186$                         | 3.44; <b><math>P=0.042</math></b>       | 4.92; <b><math>P=0.013</math></b>       | 6.39; $P=0.094$                         |
| C-JA-SA-CL | 9                 | NEO   | 3.92; <b><math>P=0.030</math></b>       | 5.96; <b><math>P=0.006</math></b>       | 12.76; <b><math>P=0.005</math></b>      | 2.33; $P=0.119$                         |

**B**

| Comparison | Days after treat. | Gluc. | HGBS                                   | LGBS                                   | HSIN                                   | LSIN                                   |
|------------|-------------------|-------|----------------------------------------|----------------------------------------|----------------------------------------|----------------------------------------|
| JA-JAL     | 3                 | AL    | 0.01; $P=0.947$                        | 0.01; $P=0.913$                        | 0.69; $P=0.421$                        | 0.57; $P=0.464$                        |
| JA-JAL     | 3                 | IN    | 5.17; <b><math>P=0.041</math></b>      | 5.25; <b><math>P=0.041</math></b>      | 1.73; $P=0.211$                        | 0.30; $P=0.591$                        |
| JA-JAL     | 3                 | TO    | 4.43; $P=0.055$                        | 4.91; <b><math>P=0.047</math></b>      | 19.00; $P=0.513$                       | 0.21; $P=0.657$                        |
| JA-JAL     | 3                 | GIB   | 2.13; $P=0.168$                        | 0.92; $P=0.355$                        | 0.09; $P=0.769$                        | 0.97; $P=0.342$                        |
| JA-JAL     | 3                 | SIN   | 0.36; $P=0.561$                        | 0.10; $P=0.752$                        | 0.72; $P=0.411$                        | 0.05; $P=0.827$                        |
| JA-JAL     | 3                 | GBS   | 43.00; <b><math>P=0.028</math></b>     | 4.33; $P=0.059$                        | 2.98; $P=0.108$                        | 2.33; $P=0.151$                        |
| JA-JAL     | 3                 | NEO   | 36.00; $P=0.206$                       | 2.31; $P=0.154$                        | 1.23; $P=0.287$                        | 0.76; $P=0.399$                        |
| JA-JAL     | 9                 | AL    | 6.17; <b><math>P=0.038</math></b>      | 13.02; <b><math>P=0.007</math></b>     | 54.35; <b><math>P\leq 0.001</math></b> | 4.02; $P=0.092$                        |
| JA-JAL     | 9                 | IN    | 25.00; <b><math>P=0.008</math></b>     | 13.46; <b><math>P=0.006</math></b>     | 0.10; $P=0.761$                        | 13.00; $P=0.143$                       |
| JA-JAL     | 9                 | TO    | 19.00; $P=0.222$                       | 0.70; $P=0.427$                        | 4.86; $P=0.059$                        | 0.03; $P=0.870$                        |
| JA-JAL     | 9                 | GIB   | 4.57; $P=0.065$                        | 7.04; <b><math>P=0.029</math></b>      | 5.54; <b><math>P=0.046</math></b>      | 5.20; $P=0.063$                        |
| JA-JAL     | 9                 | SIN   | 2.00; $P=0.195$                        | 8.02; <b><math>P=0.022</math></b>      | 36.16; <b><math>P\leq 0.001</math></b> | 1.12; $P=0.331$                        |
| JA-JAL     | 9                 | GBS   | 23.90; <b><math>P\leq 0.001</math></b> | 10.31; <b><math>P=0.012</math></b>     | 0.45; $P=0.521$                        | 13.00; $P=0.143$                       |
| JA-JAL     | 9                 | NEO   | 0.63; $P=0.452$                        | 0.64; $P=0.448$                        | 0.39; $P=0.548$                        | 3.41; $P=0.114$                        |
| SA-SAL     | 3                 | AL    | 0.09; $P=0.773$                        | 0.83; $P=0.378$                        | 1.99; $P=0.182$                        | 0.09; $P=0.766$                        |
| SA-SAL     | 3                 | IN    | 3.79; $P=0.075$                        | 19.42; <b><math>P\leq 0.001</math></b> | 11.88; <b><math>P=0.004</math></b>     | 14.16; <b><math>P=0.002</math></b>     |
| SA-SAL     | 3                 | TO    | 2.74; $P=0.124$                        | 44.00; <b><math>P=0.019</math></b>     | 8.80; <b><math>P=0.011</math></b>      | 9.19; <b><math>P=0.010</math></b>      |
| SA-SAL     | 3                 | GIB   | 0.10; $P=0.753$                        | 0.82; $P=0.382$                        | 0.01; $P=0.933$                        | 0.14; $P=0.718$                        |
| SA-SAL     | 3                 | SIN   | 22.00; $P=1.000$                       | 0.37; $P=0.553$                        | 1.75; $P=0.208$                        | 0.54; $P=0.476$                        |
| SA-SAL     | 3                 | GBS   | 34.00; $P=0.147$                       | 14.79; <b><math>P=0.002</math></b>     | 7.49; <b><math>P=0.017</math></b>      | 2.58; $P=0.132$                        |
| SA-SAL     | 3                 | NEO   | 43.00; <b><math>P=0.004</math></b>     | 30.79; <b><math>P\leq 0.001</math></b> | 10.20; <b><math>P=0.007</math></b>     | 6.64; <b><math>P=0.023</math></b>      |
| SA-SAL     | 9                 | AL    | 4.87; $P=0.058$                        | 3.81; $P=0.087$                        | 8.48; <b><math>P=0.020</math></b>      | 34.11; <b><math>P\leq 0.001</math></b> |
| SA-SAL     | 9                 | IN    | 3.73; $P=0.090$                        | 6.79; <b><math>P=0.031</math></b>      | 14.99; <b><math>P=0.005</math></b>     | 5.60; <b><math>P=0.050</math></b>      |
| SA-SAL     | 9                 | TO    | 0.24; $P=0.636$                        | 2.82; $P=0.132$                        | 2.66; $P=0.141$                        | 1.12; $P=0.326$                        |
| SA-SAL     | 9                 | GIB   | 0.57; $P=0.471$                        | 12.00; $P=1.000$                       | 6.00; $P=0.222$                        | <b>7.43; <math>P=0.030</math></b>      |
| SA-SAL     | 9                 | SIN   | 5.70; <b><math>P=0.044</math></b>      | 2.88; $P=0.128$                        | 14.44; <b><math>P=0.005</math></b>     | 1.00; <b><math>P=0.032</math></b>      |

|        |   |     |                 |                  |                  |                 |
|--------|---|-----|-----------------|------------------|------------------|-----------------|
| SA-SAL | 9 | GBS | 2.63; $P=0.144$ | 6.33; $P=0.036$  | 11.79; $P=0.009$ | 6.45; $P=0.039$ |
| SA-SAL | 9 | NEO | 0.27; $P=0.619$ | 10.75; $P=0.011$ | 3.96; $P=0.082$  | 0.00; $P=0.981$ |

**Table S5.** Mean  $\pm$  SE glucosinolate content ( $\mu\text{mol g}^{-1}$  plant dry weight) for each treatment and genotype after the application of phytohormones. The treatments are control (C), jasmonic acid (JA), salicylic acid (SA), and control with *M. brassicae* larvae (CL). The genotypes are high in glucobrassicin (HGBS), low in glucobrassicin (LGBS), high in sinigrin (HSIN), and low in sinigrin (LSIN). The glucosinolates shown are glucoiberin (GIB), sinigrin (SIN), glucobrassicin (GBS), neoglucobrassicin (NEO), total aliphatic (AL), total indolic (IN), and total glucosinolates (TO). The less abundant glucosinolates progoitrin (PRO), glucoiberin (GIV), 4-hydroxyglucobrassicin (OHGBS), 4-methoxyglucobrassicin (MEOHGBS), and gluconasturtiin (GNT) are not shown here, but are shown as supplementary data. For each time (days after treatment) and genotype, means within a column followed by different letters show significant treatment differences ( $P \leq 0.05$ ) among genotypes. Replication was n=7-10, n=5-10, and n=3-5 for 1, 3, and 9 days after treatment, respectively.

| Days after treatment | Genotype | Treatment | GIB             | SIN             | GBS              | NEO             | AL               | IN               | TO              |
|----------------------|----------|-----------|-----------------|-----------------|------------------|-----------------|------------------|------------------|-----------------|
| 1                    | HGBS     | C         | 3.9 $\pm$ 0.6a  | 9.3 $\pm$ 1.3a  | 6.8 $\pm$ 1.6a   | 0.3 $\pm$ 0.1a  | 13.3 $\pm$ 1.8a  | 7.5 $\pm$ 1.6a   | 20.8 $\pm$ 3.1a |
|                      |          | JA        | 6.6 $\pm$ 1.2a  | 13.4 $\pm$ 1.6a | 20.0 $\pm$ 2.8b  | 8.0 $\pm$ 1.7b  | 20.2 $\pm$ 2.4ab | 29.4 $\pm$ 3.5b  | 50.4 $\pm$ 4.5b |
|                      |          | SA        | 7.6 $\pm$ 1.0a  | 12.9 $\pm$ 1.7a | 8.8 $\pm$ 1.4a   | 0.7 $\pm$ 0.2a  | 21.2 $\pm$ 1.5b  | 10.3 $\pm$ 1.4a  | 31.5 $\pm$ 1.8c |
|                      | LGBS     | C         | 4.5 $\pm$ 0.7a  | 7.2 $\pm$ 0.7a  | 4.1 $\pm$ 0.5a   | 0.2 $\pm$ 0.1a  | 12.9 $\pm$ 1.2a  | 4.6 $\pm$ 0.5a   | 16.7 $\pm$ 1.4a |
|                      |          | JA        | 7.3 $\pm$ 1.2ab | 10.7 $\pm$ 2.1a | 17.3 $\pm$ 2.9b  | 1.8 $\pm$ 0.3b  | 18.2 $\pm$ 3.3ab | 20.1 $\pm$ 3.0b  | 38.8 $\pm$ 4.9b |
|                      |          | SA        | 8.3 $\pm$ 1.0b  | 12.8 $\pm$ 2.4a | 6.1 $\pm$ 0.8a   | 0.7 $\pm$ 0.1c  | 21.5 $\pm$ 2.8b  | 7.0 $\pm$ 0.9a   | 28.5 $\pm$ 3.3c |
|                      | HSIN     | C         | 3.9 $\pm$ 0.5a  | 12.1 $\pm$ 4.2a | 6.2 $\pm$ 0.8a   | 0.3 $\pm$ 0.1a  | 16.5 $\pm$ 1.6a  | 7.0 $\pm$ 0.9a   | 23.5 $\pm$ 2.3a |
|                      |          | JA        | 4.9 $\pm$ 0.7a  | 8.6 $\pm$ 3.9a  | 16.8 $\pm$ 1.9b  | 4.6 $\pm$ 0.7b  | 13.7 $\pm$ 1.8a  | 22.0 $\pm$ 2.1b  | 35.7 $\pm$ 3.1b |
|                      |          | SA        | 4.3 $\pm$ 0.5a  | 13.7 $\pm$ 6.4a | 5.8 $\pm$ 0.7a   | 0.3 $\pm$ 0.1a  | 18.3 $\pm$ 2.0a  | 6.6 $\pm$ 0.8a   | 24.9 $\pm$ 2.5a |
|                      | LSIN     | C         | 5.1 $\pm$ 1.3a  | 2.4 $\pm$ 0.6a  | 5.1 $\pm$ 0.7a   | 1.1 $\pm$ 0.6a  | 7.6 $\pm$ 1.8a   | 6.6 $\pm$ 1.1a   | 14.2 $\pm$ 2.5a |
|                      |          | JA        | 2.7 $\pm$ 0.4a  | 3.3 $\pm$ 1.4a  | 12.5 $\pm$ 1.8b  | 3.7 $\pm$ 1.0b  | 6.6 $\pm$ 1.9a   | 16.7 $\pm$ 2.1b  | 23.4 $\pm$ 3.4b |
|                      |          | SA        | 4.1 $\pm$ 0.7a  | 3.4 $\pm$ 0.7a  | 5.3 $\pm$ 0.6a   | 1.0 $\pm$ 0.4a  | 7.5 $\pm$ 1.3a   | 6.6 $\pm$ 0.7a   | 14.1 $\pm$ 1.7a |
| 3                    | HGBS     | C         | 4.4 $\pm$ 0.6a  | 10.7 $\pm$ 0.9a | 9.0 $\pm$ 0.4a   | 0.6 $\pm$ 0.2a  | 15.1 $\pm$ 1.3a  | 9.7 $\pm$ 0.5a   | 24.8 $\pm$ 1.5a |
|                      |          | JA        | 3.0 $\pm$ 0.5a  | 6.0 $\pm$ 1.1b  | 41.1 $\pm$ 3.6b  | 17.8 $\pm$ 4.7b | 9.0 $\pm$ 1.5b   | 59.6 $\pm$ 5.2b  | 68.6 $\pm$ 5.4b |
|                      |          | SA        | 4.0 $\pm$ 0.5a  | 11.0 $\pm$ 1.0a | 14.3 $\pm$ 2.3a  | 1.1 $\pm$ 0.3a  | 15.1 $\pm$ 1.2a  | 16.2 $\pm$ 2.4a  | 31.2 $\pm$ 3.2a |
|                      |          | CL        | 4.0 $\pm$ 0.3a  | 4.9 $\pm$ 0.7b  | 8.0 $\pm$ 1.4a   | 4.0 $\pm$ 1.0b  | 8.9 $\pm$ 0.6b   | 12.2 $\pm$ 2.2a  | 21.6 $\pm$ 2.2a |
|                      | LGBS     | C         | 5.6 $\pm$ 0.9a  | 8.6 $\pm$ 1.0a  | 5.5 $\pm$ 0.4a   | 0.4 $\pm$ 0.1a  | 14.2 $\pm$ 1.5a  | 6.1 $\pm$ 0.4a   | 20.2 $\pm$ 1.6a |
|                      |          | JA        | 4.1 $\pm$ 0.8a  | 6.9 $\pm$ 1.3a  | 22.1 $\pm$ 2.8b  | 2.4 $\pm$ 0.9b  | 11.3 $\pm$ 1.9a  | 25.0 $\pm$ 3.0b  | 36.4 $\pm$ 3.9b |
|                      |          | SA        | 6.2 $\pm$ 1.0a  | 10.0 $\pm$ 1.3a | 8.6 $\pm$ 0.9ac  | 0.4 $\pm$ 0.1a  | 16.4 $\pm$ 1.6a  | 9.7 $\pm$ 1.0c   | 26.0 $\pm$ 2.0a |
|                      |          | CL        | 4.2 $\pm$ 0.4a  | 7.2 $\pm$ 0.9a  | 12.7 $\pm$ 1.5bc | 2.3 $\pm$ 0.3b  | 11.6 $\pm$ 1.0a  | 15.2 $\pm$ 1.7bc | 26.8 $\pm$ 1.6a |
|                      | HSIN     | C         | 5.7 $\pm$ 0.8a  | 15.6 $\pm$ 1.3a | 10.7 $\pm$ 1.3a  | 0.9 $\pm$ 0.1a  | 21.9 $\pm$ 1.9a  | 11.8 $\pm$ 1.4a  | 33.7 $\pm$ 1.9a |
|                      |          | JA        | 3.2 $\pm$ 0.5b  | 7.9 $\pm$ 1.3b  | 40.1 $\pm$ 5.9b  | 13.3 $\pm$ 2.7b | 11.2 $\pm$ 1.5b  | 54.1 $\pm$ 5.5b  | 65.3 $\pm$ 6.1b |
|                      |          | SA        | 7.0 $\pm$ 0.8a  | 17.3 $\pm$ 1.6a | 13.6 $\pm$ 1.1ac | 0.9 $\pm$ 0.3a  | 24.6 $\pm$ 1.5a  | 15.3 $\pm$ 1.3a  | 39.9 $\pm$ 2.4a |
|                      |          | CL        | 3.0 $\pm$ 0.8b  | 9.0 $\pm$ 2.8b  | 22.8 $\pm$ 2.5c  | 4.9 $\pm$ 2.0ab | 12.2 $\pm$ 3.5b  | 28.1 $\pm$ 4.1a  | 40.7 $\pm$ 4.2a |

|   |      |    |            |           |            |           |           |            |           |
|---|------|----|------------|-----------|------------|-----------|-----------|------------|-----------|
| 9 | LSIN | C  | 4.0±0.8a   | 3.5±0.9a  | 6.9±0.9a   | 0.8±0.2a  | 7.5±1.1a  | 7.7±0.9a   | 15.2±1.9a |
|   |      | JA | 3.5±0.6a   | 1.8±0.5a  | 33.0±4.9b  | 17.2±4.8b | 5.4±0.8a  | 51.0±5.8b  | 56.3±5.6b |
|   |      | SA | 3.7±0.8a   | 3.8±0.5a  | 10.4±2.4a  | 1.1±0.3a  | 7.6±1.1a  | 11.8±2.8a  | 19.6±3.6a |
|   |      | CL | 3.1±0.5a   | 2.2±0.4a  | 25.5±4.8b  | 6.4±1.7ab | 5.3±0.5a  | 32.1±5.5ab | 37.5±6.0c |
|   | HGBS | C  | 3.0±0.3ab  | 9.4±1.7a  | 16.6±2.4a  | 2.1±0.5a  | 12.4±1.9a | 18.9±2.8a  | 31.3±4.5a |
|   |      | JA | 4.7±1.0a   | 6.7±2.0a  | 20.1±2.3a  | 5.9±1.1b  | 11.5±1.8a | 26.4±2.3b  | 38.0±3.7a |
|   |      | SA | 2.5±0.5bc  | 6.3±0.6a  | 13.6±2.6a  | 3.0±0.7a  | 8.8±0.9ab | 17.2±1.8a  | 26.1±2.0a |
|   |      | CL | 0.9±0.2c   | 1.8±0.1b  | 20.6±2.4a  | 3.7±1.0ab | 4.5±0.3b  | 24.7±2.7ab | 29.2±2.5a |
|   | LGBS | C  | 4.0±1.1a   | 9.6±1.5a  | 8.5±1.6a   | 0.3±0.1a  | 13.6±2.5a | 9.0±1.6a   | 22.7±4.1a |
|   |      | JA | 6.6±4.1a   | 9.0±1.9a  | 12.1±2.6ab | 2.6±0.8a  | 15.6±2.7a | 15.0±2.3a  | 30.5±4.3a |
|   |      | SA | 3.8±0.8a   | 8.2±0.5a  | 7.4±2.5a   | 0.7±0.2a  | 12.4±0.5a | 8.6±2.5a   | 21.0±3.0a |
|   |      | CL | 2.4±0.4a   | 1.6±0.3b  | 18.4±3.6b  | 5.6±1.8b  | 5.5±0.8b  | 24.4±4.5b  | 29.9±4.7a |
|   | HSIN | C  | 5.0±0.5abc | 12.7±1.3a | 11.2±1.2a  | 1.6±0.7a  | 18.0±1.3a | 13.1±1.8a  | 31.1±2.5a |
|   |      | JA | 6.2±0.7b   | 18.5±2.1b | 21.8±2.6b  | 5.8±1.7b  | 24.7±2.0b | 28.6±2.7b  | 53.3±4.7b |
|   |      | SA | 3.4±0.6c   | 12.9±1.3a | 13.6±2.0a  | 1.5±0.4a  | 16.5±1.8a | 15.4±2.2a  | 31.8±3.0a |
|   |      | CL | 2.0±0.4cd  | 2.8±0.4c  | 22.1±3.7b  | 8.8±1.7b  | 8.6±1.3c  | 31.3±4.9b  | 39.8±4.5a |
|   | LSIN | C  | 4.3±1.2a   | 4.1±0.5a  | 8.5±2.9a   | 1.7±0.5a  | 8.4±1.3a  | 10.4±3.0a  | 18.9±3.0a |
|   |      | JA | 5.6±1.5a   | 4.5±1.3a  | 20.7±3.8a  | 3.6±0.6a  | 10.3±2.5a | 24.9±4.3b  | 35.2±3.7b |
|   |      | SA | 3.8±0.7a   | 2.2±0.5ab | 9.3±1.5a   | 4.8±1.8a  | 6.0±0.5a  | 14.4±1.4a  | 20.4±1.7a |
|   |      | CL | 4.3±0.9a   | 1.3±0.7b  | 8.8±4.6a   | 7.8±3.4a  | 7.8±2.4a  | 17.0±5.0ab | 24.8±3.9a |

**Table S6.** Mean  $\pm$  SE glucosinolate content ( $\mu\text{mol g}^{-1}$  plant dry weight) in kale genotypes after the application of phytohormones to genotypes high in glucobrassicin (HGBS), low in glucobrassicin (LGBS), high in sinigrin (HSIN), and low in sinigrin (LSIN) (n=3-10). The treatments are jasmonic acid (JA), salicylic acid (SA), JA with *M. brassicae* larvae (JAL), and SA with *M. brassicae* larvae (SAL). The glucosinolates shown glucoiberin (GIB), sinigrin (SIN), glucobrassicin (GBS), neoglucobrassicin (NEO), total aliphatic (AL), total indolic (IN), and total glucosinolates (TO). The less abundant glucosinolates progoitrin (PRO), glucoiberin (GIV), 4-hydroxyglucobrassicin (OHGBS), 4-methoxyglucobrassicin (MEOHGBS), and gluconasturtiin (GNT) are shown as supplementary data. For each time (days after treatment) and genotype, means within a column followed by different letters show significant treatment differences ( $P \leq 0.05$ ) among genotypes. Replication was n=7-10, n=5-10, and n=3-5 for 1, 3, and 9 days after treatment, respectively.

| Days after treatment | Genotype | Treatment | GIB            | SIN             | GBS             | NEO             | AL              | IN               | TO               |
|----------------------|----------|-----------|----------------|-----------------|-----------------|-----------------|-----------------|------------------|------------------|
| 3                    | HGBS     | JA        | 3.0 $\pm$ 0.5a | 6.0 $\pm$ 1.1a  | 41.1 $\pm$ 3.6a | 17.8 $\pm$ 4.7a | 9.0 $\pm$ 1.5a  | 59.6 $\pm$ 5.2a  | 68.6 $\pm$ 5.4a  |
|                      |          | JAL       | 4.3 $\pm$ 0.7a | 4.9 $\pm$ 1.5a  | 60.4 $\pm$ 7.8b | 22.8 $\pm$ 4.3a | 9.2 $\pm$ 2.2a  | 83.7 $\pm$ 11.0b | 92.9 $\pm$ 12.4a |
|                      |          | SA        | 4.0 $\pm$ 0.5a | 11.0 $\pm$ 1.0a | 14.3 $\pm$ 2.3a | 1.1 $\pm$ 0.3a  | 15.1 $\pm$ 1.2a | 16.2 $\pm$ 2.4a  | 31.2 $\pm$ 3.2a  |
|                      |          | SAL       | 4.3 $\pm$ 0.8a | 11.4 $\pm$ 1.3a | 20.7 $\pm$ 3.4a | 3.4 $\pm$ 0.5b  | 15.7 $\pm$ 1.7a | 24.3 $\pm$ 3.5a  | 40.0 $\pm$ 4.2a  |
|                      | LGBS     | JA        | 4.1 $\pm$ 0.8a | 6.9 $\pm$ 1.3a  | 22.1 $\pm$ 2.8a | 2.4 $\pm$ 0.9a  | 11.3 $\pm$ 1.9a | 25.0 $\pm$ 3.0a  | 36.4 $\pm$ 3.9a  |
|                      |          | JAL       | 5.3 $\pm$ 1.0a | 6.3 $\pm$ 1.6a  | 35.7 $\pm$ 7.3a | 4.6 $\pm$ 1.0a  | 11.6 $\pm$ 1.2a | 40.6 $\pm$ 7.5b  | 52.3 $\pm$ 6.7b  |
|                      |          | SA        | 6.2 $\pm$ 1.0a | 10.0 $\pm$ 1.3a | 8.6 $\pm$ 0.9a  | 0.4 $\pm$ 0.1a  | 16.4 $\pm$ 1.6a | 9.7 $\pm$ 1.0a   | 26.0 $\pm$ 2.0a  |
|                      |          | SAL       | 7.5 $\pm$ 0.6a | 11.4 $\pm$ 2.2a | 20.8 $\pm$ 4.2b | 3.1 $\pm$ 0.7b  | 19.0 $\pm$ 2.4a | 24.2 $\pm$ 4.4b  | 43.2 $\pm$ 6.4b  |
|                      | HSIN     | JA        | 3.2 $\pm$ 0.5a | 7.9 $\pm$ 1.3a  | 40.1 $\pm$ 5.9a | 13.3 $\pm$ 2.7a | 11.2 $\pm$ 1.5a | 54.1 $\pm$ 5.5a  | 65.3 $\pm$ 6.1a  |
|                      |          | JAL       | 3.6 $\pm$ 1.1a | 9.8 $\pm$ 2.1a  | 23.4 $\pm$ 6.7a | 19.6 $\pm$ 6.1a | 13.4 $\pm$ 2.0a | 43.2 $\pm$ 3.3a  | 56.6 $\pm$ 2.8a  |
|                      |          | SA        | 7.0 $\pm$ 0.8a | 17.3 $\pm$ 1.6a | 13.6 $\pm$ 1.1a | 0.9 $\pm$ 0.3a  | 24.6 $\pm$ 1.5a | 15.2 $\pm$ 1.3a  | 39.9 $\pm$ 2.4a  |
|                      |          | SAL       | 6.9 $\pm$ 0.8a | 13.1 $\pm$ 3.1a | 20.4 $\pm$ 2.8b | 13.1 $\pm$ 5.8b | 20.0 $\pm$ 3.6a | 34.4 $\pm$ 7.7b  | 54.4 $\pm$ 5.0b  |
| 9                    | LSIN     | JA        | 3.5 $\pm$ 0.6a | 1.8 $\pm$ 0.5a  | 33.0 $\pm$ 4.9a | 17.2 $\pm$ 4.8a | 5.4 $\pm$ 0.8a  | 51.0 $\pm$ 5.8a  | 56.3 $\pm$ 5.6a  |
|                      |          | JAL       | 4.5 $\pm$ 1.0a | 1.9 $\pm$ 0.5a  | 21.0 $\pm$ 5.1a | 24.5 $\pm$ 7.1a | 6.5 $\pm$ 1.2a  | 45.9 $\pm$ 5.5a  | 52.4 $\pm$ 4.9a  |
|                      |          | SA        | 3.7 $\pm$ 0.8a | 3.8 $\pm$ 0.5a  | 10.4 $\pm$ 2.4a | 1.1 $\pm$ 0.3a  | 7.6 $\pm$ 1.1a  | 11.8 $\pm$ 2.8a  | 19.6 $\pm$ 3.6a  |
|                      |          | SAL       | 4.1 $\pm$ 0.6a | 2.9 $\pm$ 1.1a  | 18.9 $\pm$ 5.8a | 10.8 $\pm$ 5.5b | 7.1 $\pm$ 1.3a  | 29.9 $\pm$ 3.9b  | 37.1 $\pm$ 4.0b  |
|                      | HGBS     | JA        | 4.7 $\pm$ 1.0a | 6.7 $\pm$ 2.0a  | 20.1 $\pm$ 2.3a | 5.9 $\pm$ 1.1a  | 11.5 $\pm$ 1.8a | 26.4 $\pm$ 2.3a  | 38.0 $\pm$ 3.7a  |
|                      |          | JAL       | 1.7 $\pm$ 0.9a | 3.6 $\pm$ 0.9a  | 36.8 $\pm$ 2.5b | 7.0 $\pm$ 0.8a  | 5.3 $\pm$ 1.7b  | 44.1 $\pm$ 2.3b  | 49.4 $\pm$ 3.9a  |
|                      |          | SA        | 2.5 $\pm$ 0.5a | 6.3 $\pm$ 0.6a  | 13.6 $\pm$ 2.6a | 3.0 $\pm$ 0.7a  | 8.8 $\pm$ 0.9a  | 17.3 $\pm$ 1.8a  | 26.1 $\pm$ 2.0a  |
|                      |          | SAL       | 2.0 $\pm$ 0.4a | 3.3 $\pm$ 1.1b  | 18.8 $\pm$ 1.9a | 3.6 $\pm$ 0.9a  | 5.3 $\pm$ 1.3a  | 22.6 $\pm$ 2.1a  | 27.9 $\pm$ 3.2a  |
|                      | LGBS     | JA        | 6.6 $\pm$ 1.8a | 9.0 $\pm$ 1.9a  | 12.1 $\pm$ 2.6a | 2.6 $\pm$ 0.8a  | 15.6 $\pm$ 2.7a | 15.0 $\pm$ 2.3a  | 30.5 $\pm$ 4.3a  |
|                      |          | JAL       | 1.6 $\pm$ 0.4b | 2.9 $\pm$ 1.0b  | 26.4 $\pm$ 3.6b | 3.8 $\pm$ 1.2a  | 4.5 $\pm$ 1.4b  | 30.4 $\pm$ 3.5b  | 34.9 $\pm$ 3.0a  |
|                      |          | SA        | 3.8 $\pm$ 0.8a | 8.2 $\pm$ 0.5a  | 7.4 $\pm$ 2.5a  | 0.7 $\pm$ 0.2a  | 12.4 $\pm$ 0.5a | 8.6 $\pm$ 2.5a   | 21.0 $\pm$ 3.0a  |
|                      |          | SAL       |                |                 |                 |                 |                 |                  |                  |

|             |            |          |           |           |          |           |           |           |
|-------------|------------|----------|-----------|-----------|----------|-----------|-----------|-----------|
| <b>HSIN</b> | <b>SAL</b> | 3.5±0.5a | 6.2±1.1a  | 18.8±3.7a | 2.5±0.5a | 9.8±1.3a  | 21.5±4.2b | 31.3±5.3a |
|             | <b>JA</b>  | 6.2±0.7a | 18.5±2.1a | 21.8±2.6a | 5.8±1.7a | 24.7±2.0a | 28.6±2.7a | 53.3±4.7a |
|             | <b>JAL</b> | 3.1±1.1b | 3.4±1.3b  | 25.8±5.3a | 4.6±0.9a | 6.5±1.4b  | 30.5±5.2a | 37.7±5.3a |
|             | <b>SA</b>  | 3.4±0.6a | 12.9±1.3a | 13.6±2.0a | 1.5±0.4a | 16.5±1.8a | 15.4±2.2a | 31.8±3.0a |
| <b>LSIN</b> | <b>SAL</b> | 2.1±0.7a | 7.5±0.6b  | 25.1±2.7b | 3.7±1.0a | 10.3±1.1b | 29.3±2.8b | 39.6±3.7a |
|             | <b>JA</b>  | 5.6±1.5a | 4.5±1.3a  | 20.7±3.8a | 3.6±0.6a | 10.3±2.5a | 24.9±4.3a | 35.2±3.7a |
|             | <b>JAL</b> | 0.9±0.2a | 2.3±1.6a  | 26.3±5.8a | 6.9±2.2a | 3.2±1.7a  | 33.5±8.0a | 36.7±9.6a |
|             | <b>SA</b>  | 3.8±0.7a | 2.2±0.5a  | 9.3±1.5a  | 4.8±1.8a | 6.0±0.5a  | 14.4±1.4a | 20.4±1.7a |
|             | <b>SAL</b> | 1.4±0.3b | 1.0±0.2a  | 16.3±2.4b | 4.8±1.5a | 2.4±0.3b  | 21.5±2.8b | 23.9±3.0a |

---

**Table S7.** Changes in glucosinolate content among genotypes under C, JA, SA, CL, JAL treatments 1, 3, and 9 days after treatment with JA and SA. Test statistic and *P*-values of ANOVA or Kruskal-Wallis test shown to compare differences in glucosinolate content among genotypes subject to the same treatment. Significant *P*-values ( $P \leq 0.05$ ) are shown in bold type.

| Days after treat. | Gluc. | C                            | JA                           | SA                           | CL                          | JAL                         | SAL                          |
|-------------------|-------|------------------------------|------------------------------|------------------------------|-----------------------------|-----------------------------|------------------------------|
| 1                 | AL    | 11.06; <b><i>P</i>=0.011</b> | 5.87; <b><i>P</i>=0.002</b>  | 10.82; <b><i>P</i>≤0.001</b> | -                           | -                           | -                            |
| 1                 | IN    | 4.89; <i>P</i> =0.180        | 3.75; <b><i>P</i>=0.019</b>  | 3.29; <b><i>P</i>=0.031</b>  | -                           | -                           | -                            |
| 1                 | TO    | 3.43; <b><i>P</i>=0.028</b>  | 7.11; <b><i>P</i>≤0.001</b>  | 9.95; <b><i>P</i>≤0.001</b>  | -                           | -                           | -                            |
| 1                 | GIB   | 0.39; <i>P</i> =0.764        | 4.39; <b><i>P</i>=0.010</b>  | 7.27; <b><i>P</i>≤0.001</b>  | -                           | -                           | -                            |
| 1                 | SIN   | 23.69; <b><i>P</i>≤0.001</b> | 16.05; <b><i>P</i>≤0.001</b> | 21.68; <b><i>P</i>≤0.001</b> | -                           | -                           | -                            |
| 1                 | GBS   | 4.72; <i>P</i> =0.194        | 1.58; <i>P</i> =0.212        | 2.62; <i>P</i> =0.066        | -                           | -                           | -                            |
| 1                 | NEO   | 9.22; <b><i>P</i>=0.027</b>  | 5.96; <b><i>P</i>=0.002</b>  | 1.79; <i>P</i> =0.167        | -                           | -                           | -                            |
| 3                 | AL    | 15.69; <b><i>P</i>≤0.001</b> | 3.73; <b><i>P</i>=0.020</b>  | 25.18; <b><i>P</i>≤0.001</b> | 2.32; <i>P</i> =0.116       | 3.05; <i>P</i> =0.059       | 5.99; <b><i>P</i>=0.006</b>  |
| 3                 | IN    | 7.47; <b><i>P</i>≤0.001</b>  | 8.57; <b><i>P</i>≤0.001</b>  | 2.25; <i>P</i> =0.100        | 7.56; <b><i>P</i>=0.003</b> | 7.78; <b><i>P</i>=0.002</b> | 0.91; <i>P</i> =0.457        |
| 3                 | TO    | 20.29; <b><i>P</i>≤0.001</b> | 6.86; <b><i>P</i>≤0.001</b>  | 9.27; <b><i>P</i>≤0.001</b>  | 6.28; <b><i>P</i>=0.006</b> | 6.70; <b><i>P</i>=0.004</b> | 2.30; <i>P</i> =0.116        |
| 3                 | GIB   | 1.14; <i>P</i> =0.345        | 0.60; <i>P</i> =0.618        | 4.16; <b><i>P</i>=0.013</b>  | 1.36; <i>P</i> =0.293       | 0.62; <i>P</i> =0.610       | 6.34; <b><i>P</i>=0.005</b>  |
| 3                 | SIN   | 23.53; <b><i>P</i>≤0.001</b> | 6.41; <b><i>P</i>≤0.001</b>  | 22.34; <b><i>P</i>≤0.001</b> | 3.19; <i>P</i> =0.055       | 4.51; <b><i>P</i>=0.018</b> | 4.70; <b><i>P</i>=0.015</b>  |
| 3                 | GBS   | 7.11; <b><i>P</i>≤0.001</b>  | 3.54; <b><i>P</i>=0.024</b>  | 2.21; <i>P</i> =0.104        | 9.94; <b><i>P</i>≤0.001</b> | 7.04; <b><i>P</i>=0.003</b> | 0.04; <i>P</i> =0.988        |
| 3                 | NEO   | 7.56; <i>P</i> =0.056        | 15.49; <b><i>P</i>≤0.001</b> | 1.77; <i>P</i> =0.170        | 1.46; <i>P</i> =0.264       | 3.05; <i>P</i> =0.059       | 1.74; <i>P</i> =0.200        |
| 9                 | AL    | 4.69; <b><i>P</i>=0.016</b>  | 8.08; <b><i>P</i>=0.002</b>  | 17.79; <b><i>P</i>≤0.001</b> | 2.54; <i>P</i> =0.102       | 0.67; <i>P</i> =0.377       | 10.41; <b><i>P</i>≤0.001</b> |
| 9                 | IN    | 3.36; <b><i>P</i>=0.045</b>  | 3.97; <b><i>P</i>=0.027</b>  | 3.28; <b><i>P</i>=0.048</b>  | 1.50; <i>P</i> =0.260       | 6.61; <i>P</i> =0.085       | 1.47; <i>P</i> =0.263        |
| 9                 | TO    | 2.99; <i>P</i> =0.062        | 5.71; <b><i>P</i>=0.007</b>  | 4.54; <b><i>P</i>=0.017</b>  | 2.20; <i>P</i> =0.137       | 1.84; <i>P</i> =0.187       | 2.69; <i>P</i> =0.084        |
| 9                 | GIB   | 0.87; <i>P</i> =0.478        | 0.39; <i>P</i> =0.760        | 0.82; <i>P</i> =0.499        | 9.50; <b><i>P</i>=0.023</b> | 1.19; <i>P</i> =0.349       | 7.66; <i>P</i> =0.054        |
| 9                 | SIN   | 7.27; <b><i>P</i>=0.003</b>  | 10.99; <b><i>P</i>≤0.001</b> | 31.35; <b><i>P</i>≤0.001</b> | 2.78; <i>P</i> =0.083       | 0.20; <i>P</i> =0.895       | 10.36; <b><i>P</i>≤0.001</b> |
| 9                 | GBS   | 3.24; <b><i>P</i>=0.050</b>  | 2.40; <i>P</i> =0.106        | 2.00; <i>P</i> =0.154        | 2.18; <i>P</i> =0.139       | 1.67; <i>P</i> =0.219       | 1.76; <i>P</i> =0.197        |
| 9                 | NEO   | 9.83; <b><i>P</i>=0.020</b>  | 2.08; <i>P</i> =0.144        | 3.22; <i>P</i> =0.051        | 1.44; <i>P</i> =0.276       | 1.90; <i>P</i> =0.176       | 0.90; <i>P</i> =0.465        |



**Table S8.** Mean  $\pm$  SE glucosinolate content ( $\mu\text{mol g}^{-1}$  plant dry weight) for each treatment and genotype after the application of phytohormones (n=3-10). The treatments are control (C), jasmonic acid (JA), salicylic acid (SA), control with *M. brassicae* larvae (CL), JA with *M. brassicae* larvae (JAL), and SA with *M. brassicae* larvae (SAL). The genotypes are high in glucobrassicin (HGBS), low in glucobrassicin (LGBS), high in sinigrin (HSIN), and low in sinigrin (LSIN). The glucosinolates shown are glucoiberin (GIB), sinigrin (SIN), glucobrassicin (GBS), neoglucobrassicin (NEO), total aliphatic (AL), total indolic (IN), and total glucosinolates (TO). The less abundant glucosinolates progoitrin (PRO), glucoiberin (GIV), 4-hydroxyglucobrassicin (OHGBS), 4-methoxyglucobrassicin (MEOHGBS), and gluconasturtiin (GNT) are not shown here, but are shown as supplementary data. For each time (days after treatment) and treatment, means within a column followed by different letters show significant differences ( $P \leq 0.05$ ) among genotypes. Replication was n=7-10, n=5-10, and n=3-5 for 1, 3, and 9 days after treatment, respectively.

| Days after treatment | Treatment | Genotype | GIB             | SIN             | GBS              | NEO             | AL               | IN              | TO               |
|----------------------|-----------|----------|-----------------|-----------------|------------------|-----------------|------------------|-----------------|------------------|
| 1                    | C         | HGBS     | 3.9 $\pm$ 0.6a  | 9.3 $\pm$ 1.3a  | 6.8 $\pm$ 1.6a   | 0.3 $\pm$ 0.1ab | 13.3 $\pm$ 1.8ab | 7.5 $\pm$ 1.6a  | 20.8 $\pm$ 3.1ab |
|                      |           | LGBS     | 4.5 $\pm$ 0.7a  | 7.2 $\pm$ 0.7ab | 4.1 $\pm$ 0.5a   | 0.2 $\pm$ 0.1a  | 12.9 $\pm$ 1.2ab | 4.6 $\pm$ 0.5a  | 16.7 $\pm$ 1.4a  |
|                      |           | HSIN     | 3.9 $\pm$ 0.5a  | 12.1 $\pm$ 4.2a | 6.2 $\pm$ 0.8a   | 0.3 $\pm$ 0.1ab | 16.5 $\pm$ 1.6a  | 7.0 $\pm$ 0.9a  | 23.5 $\pm$ 2.3b  |
|                      |           | LSIN     | 5.1 $\pm$ 1.3a  | 2.4 $\pm$ 0.6b  | 5.1 $\pm$ 0.7a   | 1.1 $\pm$ 0.6b  | 7.6 $\pm$ 1.8b   | 6.6 $\pm$ 1.1a  | 14.2 $\pm$ 2.5a  |
|                      | JA        | HGBS     | 6.6 $\pm$ 1.2a  | 13.4 $\pm$ 1.6a | 20.0 $\pm$ 2.8a  | 8.0 $\pm$ 1.7a  | 20.2 $\pm$ 2.4a  | 29.4 $\pm$ 3.5a | 50.4 $\pm$ 4.5a  |
|                      |           | LGBS     | 7.3 $\pm$ 1.2a  | 10.7 $\pm$ 2.1a | 17.3 $\pm$ 2.9a  | 1.8 $\pm$ 0.3b  | 18.2 $\pm$ 3.3a  | 20.1 $\pm$ 3.0b | 38.8 $\pm$ 4.9ab |
|                      |           | HSIN     | 4.9 $\pm$ 0.7ab | 8.6 $\pm$ 3.9ab | 16.8 $\pm$ 1.9a  | 4.6 $\pm$ 0.7b  | 13.7 $\pm$ 1.8ab | 22.0 $\pm$ 2.1b | 35.7 $\pm$ 3.1b  |
|                      |           | LSIN     | 2.7 $\pm$ 0.4b  | 3.3 $\pm$ 1.4b  | 12.5 $\pm$ 1.8a  | 3.7 $\pm$ 1.0b  | 6.6 $\pm$ 1.9b   | 16.7 $\pm$ 2.1b | 23.4 $\pm$ 3.4c  |
|                      | SA        | HGBS     | 7.6 $\pm$ 1.0a  | 12.9 $\pm$ 1.7a | 8.8 $\pm$ 1.4b   | 0.7 $\pm$ 0.2a  | 21.2 $\pm$ 1.5a  | 10.3 $\pm$ 1.4a | 31.5 $\pm$ 1.8a  |
|                      |           | LGBS     | 8.3 $\pm$ 1.0a  | 12.8 $\pm$ 2.4a | 6.1 $\pm$ 0.8a   | 0.7 $\pm$ 0.1a  | 21.5 $\pm$ 2.8a  | 7.0 $\pm$ 0.9b  | 28.5 $\pm$ 3.3a  |
|                      |           | HSIN     | 4.3 $\pm$ 0.5b  | 13.7 $\pm$ 6.4a | 5.8 $\pm$ 0.7a   | 0.3 $\pm$ 0.1a  | 18.3 $\pm$ 2.0a  | 6.6 $\pm$ 0.8b  | 24.9 $\pm$ 2.5a  |
|                      |           | LSIN     | 4.1 $\pm$ 0.7b  | 3.4 $\pm$ 0.7b  | 5.3 $\pm$ 0.6a   | 1.0 $\pm$ 0.4a  | 7.5 $\pm$ 1.3b   | 6.6 $\pm$ 0.7b  | 14.1 $\pm$ 1.7b  |
| 3                    | C         | HGBS     | 4.4 $\pm$ 0.6a  | 10.7 $\pm$ 0.9a | 9.0 $\pm$ 0.4a   | 0.6 $\pm$ 0.2a  | 15.1 $\pm$ 1.3a  | 9.7 $\pm$ 0.5a  | 24.8 $\pm$ 1.5a  |
|                      |           | LGBS     | 5.6 $\pm$ 0.9a  | 8.6 $\pm$ 1.0a  | 5.5 $\pm$ 0.4b   | 0.4 $\pm$ 0.1a  | 14.2 $\pm$ 1.5a  | 6.1 $\pm$ 0.4b  | 20.2 $\pm$ 1.6a  |
|                      |           | HSIN     | 5.7 $\pm$ 0.8a  | 15.6 $\pm$ 1.3b | 10.7 $\pm$ 1.3a  | 0.9 $\pm$ 0.1a  | 21.9 $\pm$ 1.9b  | 11.8 $\pm$ 1.4a | 33.7 $\pm$ 1.9b  |
|                      |           | LSIN     | 4.0 $\pm$ 0.8a  | 3.5 $\pm$ 0.9c  | 6.9 $\pm$ 0.9b   | 0.8 $\pm$ 0.2a  | 7.5 $\pm$ 1.1c   | 7.7 $\pm$ 0.9ab | 15.2 $\pm$ 1.9c  |
|                      | JA        | HGBS     | 3.0 $\pm$ 0.5a  | 6.0 $\pm$ 1.1a  | 41.1 $\pm$ 3.6a  | 17.8 $\pm$ 4.7a | 9.0 $\pm$ 1.5ab  | 59.6 $\pm$ 5.2a | 68.6 $\pm$ 5.4a  |
|                      |           | LGBS     | 4.1 $\pm$ 0.8a  | 6.9 $\pm$ 1.3a  | 22.1 $\pm$ 2.8b  | 2.4 $\pm$ 0.9b  | 11.3 $\pm$ 1.9a  | 25.0 $\pm$ 3.0b | 36.4 $\pm$ 3.9b  |
|                      |           | HSIN     | 3.2 $\pm$ 0.5a  | 7.9 $\pm$ 1.3a  | 40.1 $\pm$ 5.9a  | 13.3 $\pm$ 2.7a | 11.2 $\pm$ 1.5a  | 54.1 $\pm$ 5.5a | 65.3 $\pm$ 6.1a  |
|                      |           | LSIN     | 3.5 $\pm$ 0.6a  | 1.8 $\pm$ 0.5b  | 33.0 $\pm$ 4.9ab | 17.2 $\pm$ 4.8a | 5.4 $\pm$ 0.8b   | 51.0 $\pm$ 5.8a | 56.3 $\pm$ 5.6a  |
|                      | SA        | HGBS     | 4.0 $\pm$ 0.5ab | 11.0 $\pm$ 1.0a | 14.3 $\pm$ 2.3a  | 1.1 $\pm$ 0.3a  | 15.1 $\pm$ 1.2a  | 16.2 $\pm$ 2.4a | 31.2 $\pm$ 3.2a  |

|   |     |      |           |           |            |           |            |            |            |
|---|-----|------|-----------|-----------|------------|-----------|------------|------------|------------|
| 9 | CL  | LGBS | 6.2±1.0b  | 10.0±1.3a | 8.6±0.9a   | 0.4±0.1a  | 16.4±1.6a  | 9.7±1.0a   | 26.0±2.0ac |
|   |     | HSIN | 7.0±0.8c  | 17.3±1.6b | 13.6±1.1a  | 0.9±0.3a  | 24.6±1.5b  | 15.3±1.3a  | 39.9±2.4b  |
|   |     | LSIN | 3.7±0.8a  | 3.8±0.5c  | 10.4±2.4a  | 1.1±0.3a  | 7.6±1.1c   | 11.8±2.8a  | 19.6±3.6c  |
|   |     | HGBS | 4.0±0.3a  | 4.9±0.7a  | 8.0±1.4a   | 4.0±1.0a  | 8.9±0.6a   | 12.2±2.2a  | 21.6±2.2a  |
|   |     | LGBS | 4.2±0.4a  | 7.2±0.9a  | 12.7±1.5a  | 2.3±0.3a  | 11.6±1.0a  | 15.2±1.7a  | 26.8±1.6ac |
|   |     | HSIN | 3.0±0.8a  | 9.0±2.8a  | 22.8±2.5b  | 4.9±2.0a  | 12.2±3.5a  | 28.1±4.1b  | 40.7±4.2b  |
|   | JAL | LSIN | 3.1±0.5a  | 2.2±0.4a  | 25.5±4.8b  | 6.4±1.7a  | 5.3±0.5a   | 32.1±5.5b  | 37.5±6.0bc |
|   |     | HGBS | 4.3±0.7a  | 4.9±1.5a  | 60.4±7.8a  | 22.8±4.3a | 9.2±2.2a   | 83.7±11.0a | 92.9±12.4a |
|   |     | LGBS | 5.3±1.0a  | 6.3±1.6ab | 35.7±7.3b  | 4.6±1.0a  | 11.6±1.2a  | 40.6±7.5b  | 52.3±6.7b  |
|   |     | HSIN | 3.6±1.1a  | 9.8±2.1b  | 23.4±6.7b  | 19.6±6.1a | 13.4±2.0a  | 43.2±3.3b  | 56.6±2.8b  |
|   | SAL | LSIN | 4.5±1.0a  | 1.9±0.5a  | 21.0±5.1b  | 24.5±7.1a | 6.5±1.2a   | 45.9±5.5b  | 52.4±4.9b  |
|   |     | HGBS | 4.3±0.8a  | 11.4±1.3a | 20.7±3.4a  | 3.4±0.5a  | 15.7±1.7a  | 24.3±3.5a  | 40.0±4.2a  |
|   |     | LGBS | 7.5±0.6b  | 11.4±2.2a | 20.8±4.2a  | 3.1±0.7a  | 19.0±2.4a  | 24.2±4.4a  | 43.2±6.4ac |
|   |     | HSIN | 6.9±0.8b  | 13.1±3.1a | 20.4±2.8a  | 13.1±5.8a | 20.0±3.6a  | 34.4±7.7a  | 54.4±5.0a  |
|   | C   | LSIN | 4.1±0.6a  | 2.9±1.1b  | 18.9±5.8a  | 10.8±5.5a | 7.1±1.3b   | 29.9±3.9a  | 37.1±4.0a  |
|   |     | HGBS | 3.0±0.3a  | 9.4±1.7a  | 16.6±2.4a  | 2.1±0.5a  | 12.4±1.9a  | 18.9±2.8a  | 31.3±4.5a  |
|   |     | LGBS | 4.0±1.1a  | 9.6±1.5a  | 8.5±1.6b   | 0.3±0.1b  | 13.6±2.5ab | 9.0±1.6b   | 22.7±4.1a  |
|   |     | HSIN | 5.0±0.5a  | 12.7±1.3a | 11.2±1.2ab | 1.6±0.7ab | 18.0±1.3b  | 13.1±1.8ab | 31.1±2.5a  |
|   | JA  | LSIN | 4.3±1.2a  | 4.1±0.5b  | 8.5±2.9b   | 1.7±0.5ab | 8.4±1.3a   | 10.4±3.0b  | 18.9±3.0a  |
|   |     | HGBS | 4.7±1.0a  | 6.7±2.0a  | 20.1±2.3a  | 5.9±1.1a  | 11.5±1.8a  | 26.4±2.3a  | 38.0±3.7a  |
|   |     | LGBS | 6.6±4.1a  | 9.0±1.9a  | 12.1±2.6a  | 2.6±0.8a  | 15.6±2.7a  | 15.0±5.2b  | 30.5±4.3a  |
|   |     | HSIN | 6.2±0.7a  | 18.5±2.1b | 21.8±2.6a  | 5.8±1.7a  | 24.7±2.0b  | 28.6±2.7a  | 53.3±4.7b  |
|   | SA  | LSIN | 5.6±1.5a  | 4.5±1.3a  | 20.7±3.8a  | 3.6±0.6a  | 10.3±2.5a  | 24.9±4.3a  | 35.2±3.7a  |
|   |     | HGBS | 2.5±0.5a  | 6.3±0.6a  | 13.6±2.6a  | 3.0±0.7a  | 8.8±0.9a   | 17.2±1.8a  | 26.1±2.0ab |
|   |     | LGBS | 3.8±0.8a  | 8.2±0.5a  | 7.4±2.5a   | 0.7±0.2a  | 12.4±0.5b  | 8.6±2.5b   | 21.0±3.0a  |
|   |     | HSIN | 3.4±0.6a  | 12.9±1.3b | 13.6±2.0a  | 1.5±0.4a  | 16.5±1.8c  | 15.4±2.2a  | 31.8±3.0b  |
|   | CL  | LSIN | 3.8±0.7a  | 2.2±0.5c  | 9.3±1.5a   | 4.8±1.8a  | 6.0±0.5ad  | 14.4±1.4ab | 20.4±1.7a  |
|   |     | HGBS | 0.9±0.2a  | 1.8±0.1a  | 20.6±2.4a  | 3.7±1.0a  | 4.5±0.3a   | 24.7±2.7a  | 29.2±2.5a  |
|   |     | LGBS | 2.4±0.4ab | 1.6±0.3a  | 18.4±3.6a  | 5.6±1.8a  | 5.5±0.8a   | 24.4±4.5a  | 29.9±4.7a  |
|   |     | HSIN | 2.0±0.4ab | 2.8±0.4a  | 22.1±3.7a  | 8.8±1.7a  | 8.6±1.3a   | 31.3±4.9a  | 39.8±4.5a  |
|   | JAL | LSIN | 4.3±0.9b  | 1.3±0.7a  | 8.8±4.6a   | 7.8±3.4a  | 7.8±2.4a   | 17.0±5.0a  | 24.8±3.9a  |
|   |     | HGBS | 1.7±0.9a  | 3.6±0.9a  | 36.8±2.5a  | 7.0±0.8a  | 5.3±1.7a   | 44.1±2.3a  | 49.4±3.9a  |
|   |     | LGBS | 1.6±0.4a  | 2.9±1.0a  | 26.4±3.6a  | 3.8±1.2a  | 4.5±1.4a   | 30.4±3.5a  | 34.9±3.0a  |
|   |     | HSIN | 3.1±1.1a  | 3.4±1.3a  | 25.8±5.3a  | 4.6±0.9a  | 6.5±1.4a   | 30.5±5.2a  | 37.7±5.3a  |
|   | SAL | LSIN | 0.9±0.2a  | 2.3±1.6a  | 26.3±5.8a  | 6.9±2.2a  | 3.2±1.7a   | 33.5±8.0a  | 36.7±9.6a  |
|   |     | HGBS | 2.0±0.4a  | 3.3±1.1a  | 18.8±1.9a  | 3.6±0.9a  | 5.3±1.3a   | 22.6±2.1a  | 27.9±3.2a  |
|   |     | LGBS | 3.5±0.5a  | 6.2±1.1b  | 18.8±3.7a  | 2.5±0.5a  | 9.8±1.3b   | 21.5±4.2a  | 31.3±5.3a  |

|             |          |          |           |          |           |           |           |
|-------------|----------|----------|-----------|----------|-----------|-----------|-----------|
| <b>HSIN</b> | 2.1±0.7a | 7.5±0.6b | 25.1±2.7a | 3.7±1.0a | 10.3±1.1b | 29.3±2.8a | 39.6±3.7a |
| <b>LSIN</b> | 1.4±0.3a | 1.0±0.2a | 16.3±2.4a | 4.8±1.5a | 2.4±0.3a  | 21.5±2.8a | 23.9±3.0a |

---

**Table S9.** Effect of JA, SA, CL, JAL, and SAL treatments on glucosinolate content in the different genotypes, 1, 3, and 9 days after treatment with JA and SA. Test statistic and *P*-values of ANOVA or Kruskal-Wallis test shown to compare differences in glucosinolate content (percentages, compared to the control within each genotype) among genotypes subject to the same treatment.

Significant *P*-values ( $P \leq 0.05$ ) are shown in bold type.

| Days after treat. | Gluc. | JA                           | SA                          | CL                           | JAL                         | SAL                         |
|-------------------|-------|------------------------------|-----------------------------|------------------------------|-----------------------------|-----------------------------|
| 1                 | AL    | 3.30; <b><i>P</i>=0.031</b>  | 5.13; <b><i>P</i>=0.005</b> | -                            | -                           | -                           |
| 1                 | IN    | 3.06; <b><i>P</i>=0.041</b>  | 3.20; <b><i>P</i>=0.035</b> | -                            | -                           | -                           |
| 1                 | TO    | 4.08; <b><i>P</i>=0.014</b>  | 6.67; <b><i>P</i>≤0.001</b> | -                            | -                           | -                           |
| 1                 | GIB   | 5.00; <b><i>P</i>=0.005</b>  | 8.74; <b><i>P</i>≤0.001</b> | -                            | -                           | -                           |
| 1                 | SIN   | 9.18; <b><i>P</i>=0.027</b>  | 4.08; <i>P</i> =0.252       | -                            | -                           | -                           |
| 1                 | GBS   | 2.63; <i>P</i> =0.065        | 2.04; <i>P</i> =0.126       | -                            | -                           | -                           |
| 1                 | NEO   | 8.81; <b><i>P</i>≤0.001</b>  | 4.30; <b><i>P</i>=0.011</b> | -                            | -                           | -                           |
| 3                 | AL    | 1.52; <i>P</i> =0.226        | 0.35; <i>P</i> =0.787       | 1.52; <i>P</i> =0.251        | 1.12; <i>P</i> =0.370       | 1.52; <i>P</i> =0.249       |
| 3                 | IN    | 4.16; <b><i>P</i>=0.013</b>  | 0.83; <i>P</i> =0.488       | 8.39; <b><i>P</i>=0.002</b>  | 4.97; <b><i>P</i>=0.013</b> | 1.59; <i>P</i> =0.231       |
| 3                 | TO    | 11.82; <b><i>P</i>≤0.001</b> | 0.94; <i>P</i> =0.431       | 12.56; <b><i>P</i>≤0.001</b> | 7.32; <b><i>P</i>=0.003</b> | 3.07; <i>P</i> =0.058       |
| 3                 | GIB   | 0.97; <i>P</i> =0.418        | 1.00; <i>P</i> =0.405       | 2.23; <i>P</i> =0.126        | 1.16; <i>P</i> =0.354       | 1.46; <i>P</i> =0.264       |
| 3                 | SIN   | 1.40; <i>P</i> =0.261        | 0.09; <i>P</i> =0.967       | 1.74; <i>P</i> =0.202        | 0.58; <i>P</i> =0.639       | 0.93; <i>P</i> =0.449       |
| 3                 | GBS   | 0.73; <i>P</i> =0.542        | 0.57; <i>P</i> =0.638       | 10.04; <b><i>P</i>≤0.001</b> | 6.25; <b><i>P</i>=0.005</b> | 1.71; <i>P</i> =0.206       |
| 3                 | NEO   | 3.35; <b><i>P</i>=0.030</b>  | 0.87; <i>P</i> =0.464       | 0.54; <i>P</i> =0.662        | 2.85; <i>P</i> =0.071       | 0.91; <i>P</i> =0.458       |
| 9                 | AL    | 0.84; <i>P</i> =0.491        | 2.63; <i>P</i> =0.086       | 4.22; <b><i>P</i>=0.027</b>  | 0.12; <i>P</i> =0.947       | 4.89 <b><i>P</i>=0.014</b>  |
| 9                 | IN    | 2.86; <i>P</i> =0.070        | 1.40; <i>P</i> =0.280       | 2.50; <i>P</i> =0.106        | 2.00; <i>P</i> =0.160       | 3.28; <b><i>P</i>=0.050</b> |
| 9                 | TO    | 3.39; <b><i>P</i>=0.044</b>  | 1.26; <i>P</i> =0.321       | 1.14; <i>P</i> =0.368        | 1.70; <i>P</i> =0.212       | 1.80; <i>P</i> =0.190       |
| 9                 | GIB   | 0.32; <i>P</i> =0.811        | 0.40; <i>P</i> =0.756       | 5.95; <b><i>P</i>=0.009</b>  | 0.64; <i>P</i> =0.601       | 8.65; <b><i>P</i>=0.034</b> |
| 9                 | SIN   | 1.80; <i>P</i> =0.188        | 5.19; <b><i>P</i>=0.011</b> | 0.96; <i>P</i> =0.443        | 0.55; <i>P</i> =0.659       | 4.02; <b><i>P</i>=0.028</b> |
| 9                 | GBS   | 3.23; <i>P</i> =0.051        | 0.76; <i>P</i> =0.534       | 2.06; <i>P</i> =0.155        | 1.29; <i>P</i> =0.315       | 3.17; <i>P</i> =0.055       |
| 9                 | NEO   | 4.11; <b><i>P</i>=0.024</b>  | 1.94; <i>P</i> =0.164       | 4.36; <b><i>P</i>=0.025</b>  | 4.14; <b><i>P</i>=0.027</b> | 7.99; <b><i>P</i>=0.002</b> |

**Table S10.** Significance of correlations between aliphatic (AL) and indolic (IN) glucosinolate in induced plants. Data used in the correlations included all glucosinolate data from the four plant genotypes (HGBS, LGBS, HSIN, and LSIN) for each of the treatments, 1, 3 and 9 days after JA and SA treatment (n=39-40) and 3 and 9 days after CL, JAL, and SAL treatments began (n=19-20). Significant *P*-values ( $P \leq 0.05$ ) of one-tailed Spearman's rho correlation are shown in bold type.

| Correlations between AL and IN glucosinolate content ( $\mu\text{mol g}^{-1}$ plant dry weight) |                              |                              |                               |                         |                              |
|-------------------------------------------------------------------------------------------------|------------------------------|------------------------------|-------------------------------|-------------------------|------------------------------|
| Spearman's rho correlation coefficients and <i>P</i> -values                                    |                              |                              |                               |                         |                              |
|                                                                                                 | JA                           | SA                           | CL                            | JAL                     | SAL                          |
| 1 day                                                                                           | 0.417; <b><i>P</i>=0.004</b> | 0.362; <b><i>P</i>=0.011</b> | -                             | -                       | -                            |
| 3 days                                                                                          | -0.105; <i>P</i> =0.262      | 0.367; <b><i>P</i>=0.011</b> | -0.400; <b><i>P</i>=0.045</b> | -0.301; <i>P</i> =0.099 | -0.305; <i>P</i> =0.095      |
| 9 days                                                                                          | 0.134; <i>P</i> =0.287       | -0.096; <i>P</i> =0.343      | -0.017; <i>P</i> =0.474       | 0.104; <i>P</i> =0.340  | 0.523; <b><i>P</i>=0.011</b> |

**Table S11.** Differences in larval weights after feeding on leaf discs of the different plant genotypes and treatments during 9 days (n=8-10). *P*-values from Mann-Whitney U tests. Significant *P*-values ( $P \leq 0.05$ ) are shown in bold type.

| HGBS | C                     | JA                    |
|------|-----------------------|-----------------------|
| SA   | <i>P</i> =0.491       | <b><i>P</i>=0.029</b> |
| JA   | <b><i>P</i>=0.028</b> | -                     |
| LGBS | C                     | JA                    |
| SA   | <i>P</i> =0.161       | <i>P</i> =0.236       |
| JA   | <i>P</i> =0.815       | -                     |
| HSIN | C                     | JA                    |
| SA   | <i>P</i> =0.321       | <b><i>P</i>=0.019</b> |
| JA   | <b><i>P</i>=0.006</b> | -                     |
| LSIN | C                     | JA                    |
| SA   | <i>P</i> =0.075       | <b><i>P</i>=0.034</b> |
| JA   | <b><i>P</i>=0.001</b> | -                     |

**Table S12.** Comparison of the percentage of leaf discs with defoliation  $\geq 50\%$  as a result of larval feeding under control (C), jasmonic acid (JA), and salicylic acid (SA) treatments. Significant *P*-values ( $P \leq 0.05$ ) of one-tailed two-sample tests of proportions are shown in bold type.

|             | Comparison       | C     | JA    | SA    | Test statistic and <i>P</i> -value     |
|-------------|------------------|-------|-------|-------|----------------------------------------|
| <b>HGBS</b> | <b>C vs. JA</b>  | 52.4% | 36.5% | -     | $z=0.68$ ; $P=0.249$                   |
| <b>HGBS</b> | <b>C vs. SA</b>  | 52.4% | -     | 55.3% | $z=0.12$ ; $P=0.548$                   |
| <b>HGBS</b> | <b>JA vs. SA</b> | -     | 36.5% | 55.3% | $z=0.78$ ; $P=0.218$                   |
| <b>LGBS</b> | <b>C vs. JA</b>  | 41.1% | 47.6% | -     | $z=0.27$ ; $P=0.394$                   |
| <b>LGBS</b> | <b>C vs. SA</b>  | 41.1% | -     | 46.4% | $z=0.21$ ; $P=0.415$                   |
| <b>LGBS</b> | <b>JA vs. SA</b> | -     | 47.6% | 46.4% | $z=0.05$ ; $P=0.480$                   |
| <b>HSIN</b> | <b>C vs. JA</b>  | 65.1% | 21.4% | -     | $z=1.93$ ; <b><math>P=0.027</math></b> |
| <b>HSIN</b> | <b>C vs. SA</b>  | 65.1% | -     | 39.3% | $z=0.83$ ; $P=0.204$                   |
| <b>HSIN</b> | <b>JA vs. SA</b> | -     | 21.4% | 39.3% | $z=1.06$ ; $P=0.144$                   |
| <b>LSIN</b> | <b>C vs. JA</b>  | 57.1% | 35.7% | -     | $z=0.90$ ; $P=0.183$                   |
| <b>LSIN</b> | <b>C vs. SA</b>  | 57.1% | -     | 55.7% | $z=0.06$ ; $P=0.475$                   |
| <b>LSIN</b> | <b>JA vs. SA</b> | -     | 35.7% | 55.7% | $z=0.84$ ; $P=0.199$                   |

**Table S13.** Significance of correlations between plant glucosinolate content and larval weight at the end of the experiment (A) and between plant glucosinolate content and percentage of leaf discs with defoliation  $\geq 50\%$  (B). Correlations are shown for glucosinolate content 3 days and 9 days after JA and SA treatment. Data used were the glucosinolate averages corresponding to each plant genotype (HGBS, LGBS, HSIN, and LSIN) and treatment (C, JA, and SA) (n=12). Three different classes of glucosinolates were distinguished, aliphatic (AL), indolic (IN), and total (TO). Significant *P*-values ( $P \leq 0.05$ ) are shown in bold type.

**A**

| Correlations between plant glucosinolate content and larval weight<br>Pearson's correlation coefficients and <i>P</i> -values |           |                                |                                |           |                                |              |
|-------------------------------------------------------------------------------------------------------------------------------|-----------|--------------------------------|--------------------------------|-----------|--------------------------------|--------------|
|                                                                                                                               | AL 3 days | IN 3 days                      | TO 3 days                      | AL 9 days | IN 9 days                      | TO 9 days    |
| Coefficient                                                                                                                   | 0.270     | -0.853                         | -0.853                         | -0.435    | -0.839                         | -0.818       |
| <i>P</i> -value                                                                                                               | 0.198     | <b><math>\leq 0.001</math></b> | <b><math>\leq 0.001</math></b> | 0.079     | <b><math>\leq 0.001</math></b> | <b>0.001</b> |

**B**

| Correlations between plant glucosinolate content and percentage of leaf discs with defoliation $\geq 50\%$<br>Pearson's correlation coefficients and <i>P</i> -values |           |              |              |              |              |              |
|-----------------------------------------------------------------------------------------------------------------------------------------------------------------------|-----------|--------------|--------------|--------------|--------------|--------------|
|                                                                                                                                                                       | AL 3 days | IN 3 days    | TO 3 days    | AL 9 days    | IN 9 days    | TO 9 days    |
| Coefficient                                                                                                                                                           | 0.213     | -0.729       | -0.735       | -0.600       | -0.644       | -0.768       |
| <i>P</i> -value                                                                                                                                                       | 0.253     | <b>0.004</b> | <b>0.003</b> | <b>0.019</b> | <b>0.012</b> | <b>0.002</b> |
